# Supplementary material for: The genetic basis of phage susceptibility, cross-resistance and host-range in Salmonella
Source: PubMed Central journal article supplement (PMC8744999; doi:10.1099/mic.0.001126), 2021-12-15
Supplement: mic-167-1126-s001.pdf [file mic-167-1126-s001.pdf]

1 **Supplementary Information for**

2  
3 **The Genetic Basis of phage susceptibility, cross-resistance and**  
4 **host-range in *Salmonella***

5  
6  
7 Benjamin A. Adler<sup>1,2,3</sup>, Alexey E. Kazakov<sup>4</sup>, Crystal Zhong<sup>2</sup>, Hualan Liu<sup>4</sup>,  
8 Elizabeth Kutter<sup>5</sup>, Lauren M. Lui<sup>4</sup>, Torben N. Nielsen<sup>4</sup>, Heloise Carion<sup>2</sup>, Adam M.  
9 Deutschbauer<sup>4,6</sup>, Vivek K. Mutalik<sup>3,4\*</sup>, Adam P. Arkin<sup>2,3,4\*</sup>

- 10  
11  
12  
13 1. The UC Berkeley-UCSF Graduate Program in Bioengineering, Berkeley,  
14 California, United States  
15 2. Department of Bioengineering, University of California, Berkeley,  
16 Berkeley, California, United States  
17 3. Innovative Genomics Institute, University of California, Berkeley,  
18 Berkeley, United States  
19 4. Environmental Genomics and Systems Biology Division, Lawrence  
20 Berkeley National Laboratory, Berkeley, California, United States  
21 5. The Evergreen State College, Olympia, Washington, United States  
22 6. Department of Plant and Microbial Biology, University of California,  
23 Berkeley, Berkeley, California, United States  
24  
25

26 \* Correspondence:

27 Vivek K. Mutalik (vkmusalik@lbl.gov), Adam P. Arkin (aparkin@lbl.gov)

28  
29  
30  
31

32 **Text S1**

33 **Extended Results: RB-TnSeq LPS Mutants.**

34 In *Salmonella* species, LPS is well-characterized and highly diversified at O-antigen residues.  
35 Generally, LPS structure consists of 4 regions: KDO sugars covalently bonded to lipid A, the inner  
36 core, outer core, and O-antigen repeat (Figure 2A). In wild-type *S. Typhimurium* LT2 (parental  
37 strain for MS1868), the O-antigen is made up of 200 hexose monomers per polymer (1). These  
38 regions vary phylogenetically, with KDO and inner core structures being conserved across many  
39 genera and outer core structures not conserved between species. O-antigen structures in  
40 particular exhibit high degrees of variability – approximately 46 O-antigen structures have been  
41 discovered in *Salmonella* spp. (2). Within the same strain, O-antigen structures can exhibit  
42 variability; through a variety of regulatory mechanisms, O-antigen can manifest as capsular  
43 polysaccharide, vary in repeat number, and vary in sugar modifications (1, 3–5).

44  
45 The MS1868 library included mutants in 25 genes responsible for LPS biosynthesis and  
46 transport. 15 of these genes are involved in core LPS biosynthesis (*rfaH*, *rfaC*, *rfaZ*, *yaeD*, *rfaD*,  
47 *rfaP*, *rfaE*, *rfaF*, *rfaQ*, *rfaY*, *rfaG*, *rfaB*, *galE*, *rfaI*, and *rfaK*) and 9 genes are involved in O-antigen  
48 biosynthesis (*rfaL*, *wzzB*, *rfbP*, *rfbK*, *rfbC*, *rfbD*, *rfbB*, *pgm*, *galE*, and *oafA*). GalE synthesizes a  
49 precursor used in both LPS core and O-antigen biosynthesis (Figure 2A). In general, a loss of  
50 function mutation in a biosynthetically upstream gene disrupts remaining LPS and O-antigen  
51 biosynthesis. (1) *rfaZ*, *rfaY*, and *rfaQ* are not required for O-antigen maturation (6), (2) *rfaB*  
52 mutants yield strains with a heterogenous LPS O-antigen phenotype (7), (3) *yaeD* mutants in *E.*  
53 *coli* can form heptose-less LPS (8), and (4) *oafA* mutants do not otherwise affect O-antigen  
54 maturation (9). In general, LPS requirements for each phage were found to be consistent  
55 between fitness data and an established chemotype-defined LPS mutant panel in *S.*  
56 *Typhimurium*, representing 14 distinct LPS chemotypes (*Salmonella* Genetic Stock Center  
57 (SGSC), Figures S3-S11, S13-S15). An overview of the LPS requirements for phages Aji\_GE,  
58 Chi, FelixO1, P22, Reaper\_GE, Savina\_GE, and SP6 can be seen in Figures S3 and S12. An  
59 overview of the LPS requirements for phages Br60, Ffm, and Shishito\_GE can be seen in Figure  
60 S4. As a resource, an in-depth discussion of these results is continued below.

61

62 **Extended Results: O-Antigen Requiring Phages P22 SP6, Reaper\_GE, and Savina\_GE**

63 Four of the phages tested (P22, SP6, Reaper\_GE, Savina\_GE) displayed strict requirements for  
64 full O4[5] antigen biosynthesis despite being unrelated (Figures S3BC and S12, Table 1). This  
65 was expected for both P22 and SP6 since the O4[5] antigen is the established receptor for these  
66 phages (10–12). SP6 and P22 had the most stringent LPS and O-antigen requirements, requiring  
67 19 and 18 of the 25 LPS and O-antigen biosynthesis genes respectively across liquid and solid  
68 fitness experiments. Relative to P22, SP6 additionally required *yaeD* activity, suggesting that it is  
69 less infective on heptose-less LPS (8). Although *rfaZ* and *rfaQ* gave high mean fitness scores for  
70 both phages, these scores were only high when the expected insertion was oriented against  
71 transcription (example shown in Figure S1C), indicating that these fitness values were likely due  
72 to polar, transcription-disrupting effects on downstream genes. These results were largely  
73 consistent with a related genome-wide screen against P22 infection (13). Compared to this study,  
74 host-factor requirement differences for P22 were largely attributed to differences in library  
75 coverage. Because the coverage of each library is different, each library can interrogate unique  
76 genes that the other can not. Due to better coverage in our library, our screens identified *rfaC*,  
77 *rfaD*, and *rfaE*. Due to lower coverage in our library, we were unable to analyze effects of mutants  
78 for several genes in O-antigen biosynthesis (highlighted in Figure 2A). Despite being analyzed in  
79 both studies, our study additionally identified *rfaP* as a novel host-factor for P22 (as well as SP6).

80

81 Unlike P22 and SP6, Reaper\_GE and Savina\_GE are novel phages investigated in this study and  
82 had no prior known host-requirements. The only genes Reaper\_GE and Savina\_GE required in  
83 this study were 16 and 15 of the 25 LPS and O-antigen biosynthesis genes respectively across  
84 liquid (both) and solid (Reaper\_GE only) fitness experiments. Some additional host-requirement  
85 differences were noted between Reaper\_GE and Savina\_GE versus P22 and SP6. For instance,  
86 strains with *yaeD*, *pgm*, and *rfaB* (responsible for inner-core heptose biosynthesis and O-antigen  
87 precursor biosynthesis (Figure 2A)) disruptions were sensitive to Reaper\_GE or Savina\_GE  
88 phages. Additionally, the only *rfaP* disruptions that were fit against Reaper\_GE and Savina\_GE  
89 were oriented against transcription and are likely polar effects. This absolute requirement for  
90 intact O-antigen including a complete LPS core was validated for Reaper\_GE in our LPS  
91 chemotype panel (Figure S7). Based on these results, we propose O-antigen as the receptor for  
92 Reaper\_GE phage.

93  
94 Unlike Reaper\_GE, Savina\_GE did not require *rfaI* (responsible for the second glucose addition  
95 to the outer core (Figure 2A)) and *rfaH* (responsible for activation of *rfa* and *rfaB* operons). We  
96 found that fitness scores for genes changed in magnitude by position in the proteins' role in LPS  
97 biosynthesis. For instance, we found that O-antigen mutants displayed the strongest fitness in the  
98 presence of Savina\_GE, followed by inner core mutants, and then outer core mutants (Figure  
99 S3B, Dataset S4), suggesting differential host interaction with LPS and O-antigen moieties.  
100 Unlike all other phages investigated here, solid assays yielded little selection pressure against  
101 Savina\_GE, suggesting generally poor infection of Savina\_GE to wild-type MS1868. We further  
102 investigated this fitness pattern on our LPS chemotype panel and found results consistent with  
103 our BarSeq data; phage Savina\_GE was most infective against strains with an incomplete outer  
104 core, but less so against strains without O-antigen or strains missing outer core entirely (Figure  
105 S9). Based on this data, it appears that phage Savina\_GE employs an infection strategy similar to  
106 phage PVP-SE1(14). Potentially, Savina\_GE preferentially employs LPS as a receptor, but  
107 branched LPS residues such as those added by *rfaK* and O-antigen biosynthesis hinder  
108 adsorption.

#### 109 110 **Extended Results: FelixO1 LPS Requirements**

111 FelixO1 gave results consistent with literature identifying outer core GlcNAc, the biosynthetic  
112 product of RfaK, as FelixO1's primary receptor (15). In addition, mutants in 12 of the LPS  
113 biosynthesis genes conferred resistance against FelixO1 (*rfaH*, *rfaC*, *yaeD*, *rfaD*, *rfaP*, *rfaE*, *rfaF*,  
114 *rfaG*, *rfaB*, *galE*, *rfaI*, and *rfaK*) in both liquid and solid fitness experiments. High fitness score of  
115 *yaeD* (responsible for inner-core heptose biosynthesis), suggested the importance of inner core  
116 integrity for FelixO1 infection (8). We also found an additional 61 non-LPS genes important in  
117 FelixO1 infection, which will be discussed below (see "Discovery of Novel Cross-Resistant  
118 Genotypes Between Diverse Phages" in the main text).

#### 119 120 **Extended Results: LPS Requirements of Protein Receptor Phages S16, Chi, and Aji\_GE**

121 S16, Chi, and Aji\_GE all likely employ protein-based receptors (see Extended Results: Protein  
122 Receptor Requirements of Protein Receptor Phages S16, Chi, and Aji\_GE), but also each had  
123 some degree of reliance on LPS. *rfaI* and *rfaG* mutants provided small, but significant, fitness  
124 benefits against phage S16 (Figure S3). Plaque assays against defined LPS chemotypes  
125 suggested decreased infectivity due to *rfaF* and *rfaG* mutants (Figure S10), but overall, these  
126 results are consistent with literature suggesting that inner core *Salmonella* LPS assist in, but are  
127 not strictly required for, S16 adsorption (16). Mutants in *rfaH*, *yaeD*, *rfaP*, *rfaQ*, *rfaY*, *rfaG*, and  
128 *pgm* all provided fitness benefits against phage Chi, results not before observed for Chi.  
129 Nonetheless, it is likely that these mutants primarily impact motility, thus reducing Chi infectivity

130 (see Extended Results: Protein Receptor Requirements of Protein Receptor Phages S16, Chi,  
131 and Aji\_GE) (17); additionally, homologs of *rfaH*, *rfaP*, *rfaQ*, *rfaY*, and *rfaG* are among the least  
132 motile mutants in experiments for *E. coli* BW25113 (18). Since LPS disruptions induce stress  
133 responses, this pleiotropy may be stress-induced downregulation of outer membrane proteins  
134 and flagellar activity (19).

135

### 136 **Extended Results: Protein Receptor Requirements of Protein Receptor Phages S16, Chi,** 137 **and Aji\_GE**

138 Phages S16, Aji\_GE, and Chi showed dependence on outer protein structures in addition to LPS.  
139 Prior genetic and biochemical characterization of T4-like phage S16 identified OmpC as the  
140 primary receptor (16). Concordantly, in our screens, *ompC* loss of function mutants were highly fit  
141 against S16. In addition, mutants of positive regulators of *ompC* expression, *ompR* and *envZ*  
142 (20), were enriched against S16 (Figure S16AB). Our screens are consistent with earlier findings  
143 of OmpC as the primary receptor with influence from LPS for S16, similar to similar screens  
144 against related phage T4 (Figures 1B, S3BC, and S16ABC) (16, 19). Because loss-of-function of  
145 OmpC yields S16 phage resistance and OmpC has been implicated in antibiotic resistance in  
146 *Salmonella* and related species (21–23), there may be synergetic effects through use of S16 as  
147 an antibiotic adjuvant.

148

149 For T5-like phage Aji\_GE, we find *fepA* (that encodes a TonB-dependent enterobactin receptor)  
150 as a high-scoring host-factor in addition to *oafA*. As FepA is known to form a complex with TonB  
151 and function as a receptor for some T5-like phages, such as phage H8 (24), we believe the FepA-  
152 TonB complex is the primary receptor for phage Aji\_GE (Figure S16AC). As our RB-TnSeq library  
153 lacked *tonB* mutants, we created *fepA* and *tonB* deletions to validate the role of FepA and to  
154 assess the requirement of TonB. Indeed, individual *fepA* or *tonB* deletion mutants gave  
155 resistance to Aji\_GE, confirming their essentiality for Aji\_GE infection (Figures S16-S17). These  
156 results indicate that, potentially similar to phages T5 and SPC35, phage Aji\_GE employs LPS  
157 modifications (here, added by OafA) to enhance infection (25, 26) and gain access to the FepA-  
158 TonB complex for efficient infection.

159

160 Bacteriophage Chi is a model flagellar-binding bacteriophage that employs flagellar activity to  
161 approach the *S. Typhimurium* outer membrane (27). Because flagellar assembly and activity is  
162 dependent on the concerted activity of around 50 genes (for a review on enteric flagella, see  
163 Macnab et al. (2003) (28)), we postulated that a systems-level view may provide efficient insight  
164 into the host-requirements for Chi-like phage versus individual genetic mutant studies. As  
165 expected, 36 genes across *flg*, *flh*, *fli*, and *mot* operons responsible for flagellar biosynthesis and  
166 regulation gave strong fitness scores, implicating the importance of flagellar biosynthesis for  
167 phage Chi infection (Figure S16A).

168

169 In addition, we found a number of flagellar activity-modulating factors important against phage  
170 Chi infection. For example, we observed *cheZ* mutants fit against Chi phage (Figure S18). CheZ  
171 functions by dephosphorylating CheY-phosphate, biasing flagella counterclockwise towards  
172 smooth swimming (28). Putatively, loss of CheZ activity biases flagellar activity clockwise, leading  
173 to tumbling and subsequent Chi resistance, consistent with CheY activity studies and Chi phage  
174 (29). In addition, several mutants in guanosine penta/tetraphosphate ((p)ppGpp) biosynthesis and  
175 metabolism were enriched in Chi infection experiments, potentially due to impacts on motility (30).  
176 Other top-scoring mutants against Chi infection include *nusA*, *tolA*, and *cyaA*, that were earlier  
177 found to greatly decrease *E. coli* motility (18), suggesting that indirect motility defects provide  
178 numerous routes to resist flagella-dependent phages. Because phase I flagellin, *fliC*, show high

179 fitness scores, but phase II flagellin, *fljB*, and *fljC*'s repressor, *fljA*, did not, Chi infection could be  
180 specific to phase I flagellar phenotypes (31). However, further studies are needed to dive deeper  
181 and mechanistically confirm this result.

182  
183 As high-throughput genetic screens to infer interactions between bacteriophage and their hosts  
184 grow more commonplace, we expect to see further enrichments in our understanding of  
185 bacteriophage adsorption requirements. For instance, we doubt that dual LPS + protein receptor  
186 combinations are unique to S16, Aji\_GE, and Chi - many such combinations likely remain to be  
187 discovered as more phage are characterized. Additionally, many Chi-like bacteriophage variants  
188 exist, some of which depend on different flagellar rotations or other flagellin filaments (30, 32).  
189 Due to the pooled nature of RB-TnSeq experiments, we are able to characterize in a single  
190 experiment what would have otherwise taken over 75 individual mutant experiments for some of  
191 these phages.

192  
193 **Extended Results: Uncovering Host-Factors of Rough-LPS Requiring Phages Br60, Ffm,  
194 and Shishito\_GE**

195 Br60, Ffm, and the newly isolated Shishito\_GE phages are capable of infecting *Salmonella* with  
196 rough-phenotype-LPS (this phenotype hereon referred to as “rough-LPS”), but not smooth  
197 phenotype LPS (ie wild-type for MS1868) (Figures S13-S15). Against O-antigen positive strains,  
198 such as our library base strain, MS1868, none of these phages successfully infect as they are  
199 occluded from their native receptor by the O-antigen structure. However, they can infect strains  
200 without O-antigen (33) (Figures S4, S13-S15). Thus, the resistance landscape between O-  
201 antigen requiring phages (for instance P22, Reaper\_GE, or SP6) and rough-LPS requiring  
202 phages (Br60, Ffm, and Shishito\_GE) presents an evolutionary trade-off through collateral  
203 sensitivity. In other words, many mutants resistant to O-antigen requiring phages display  
204 increased sensitivity to the rough-LPS requiring phages.

205  
206 As expected with our MS1868 library primarily consisting of O-antigen positive mutants, the vast  
207 majority of gene disruptions in MS1868 showed no significant fitness benefit against these  
208 phages. However, we noticed strong fitness defects in many of the LPS and O-antigen mutants in  
209 our library (Dataset S4), consistent with optimal adsorption and infection in O-antigen-defective  
210 *Salmonellae*.

211  
212 Many lab model strains of *E. coli* lost their ability to produce O-antigen, but have a similar inner  
213 and outer core LPS structure to *S. Typhimurium* (34). Thus we postulated and confirmed that  
214 these phages may additionally infect strains such as *E. coli* K-12 BW25113 (BW25113) (Figure  
215 S4C). Thus, we repeated experiments for these 3 phages using an earlier reported *E. coli* RB-  
216 TnSeq library as a model rough-LPS library analog to the MS1868 library (19, 35). Consistent  
217 with related phages T3 and T7 from earlier library analyses, few host-factors were required for  
218 infection. All 3 phages showed slightly different LPS requirements for infection. Against Ffm and  
219 Shishito\_GE, mutants in *gmhA*, *hldE*, *hldD*, and *waaC* were phage-resistant (*gmhA*, *rfaE*, *rfaD*,  
220 *rfaC* MS1868 homologs respectively). Ffm additionally required *waaG* (*rfaG* MS1868 homolog)  
221 for infectivity. However, no LPS or protein mutants were fit against Br60. *trxA* mutants were fit  
222 against all three rough-LPS requiring phages (Figure S4D, Dataset).

223  
224 To confirm that these results were extensible to *S. Typhimurium*, we assayed infectivity against  
225 our LPS mutant collection (SGSC, Figures S13-S15). Indeed, the results observed against the *S.*  
226 *Typhimurium* LPS panel were perfectly analogous to the fitness experiments observed against

227 the BW25113 library, with the exception of *rfaB*, which has a known heterogenous, smooth  
228 phenotype in *S. Typhimurium* and likely occludes adsorption (7). *S. Typhimurium* homologs of  
229 host-factors inferred from the BW25113 library experiments were important for infection of these  
230 phages. Ffm required function of *rfaC*, *rfaD*, *rfaG*, *rfaB*, and loss of O-antigen (Figure S13).  
231 Shishito\_GE required function of *rfaC*, *rfaD*, *rfaB*, and loss of O-antigen (Figure S14). Br60 only  
232 required loss of O-antigen (Figure S15). From our *E. coli* and *S. Typhimurium* LOF libraries and  
233 *S. Typhimurium* LPS mutant collection results, we conclude that these related T7-like  
234 bacteriophages require distinct LPS moieties, providing additional resolution to the putative  
235 receptors of these phages. Br60 emerged from these experiments as a particularly interesting  
236 phage due to the inability to detect important host-factors other than *trxA* from the saturated  
237 BW25113 transposition library; potentially this phage binds to LPS KDO sugars. These LPS  
238 residues are synthesized by enzymes encoded by essential genes, making host-side loss-of-  
239 function a futile way for a pathogen to escape this phage. Because the loss of function cross-  
240 resistance with O-antigen requiring phages (Figure S3BC) is minimized with Br60, Br60 appears  
241 to be a better candidate for exploiting collateral sensitivity than Ffm or Shishito\_GE if applied  
242 alongside an O-antigen requiring phage.  
243

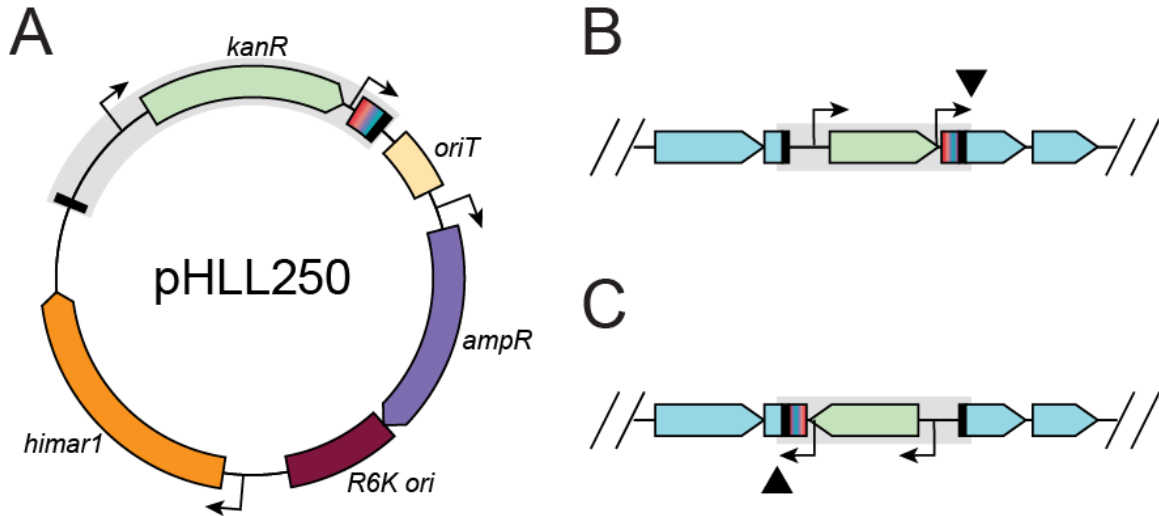

244  
 245  
 246  
 247  
 248  
 249  
 250  
 251  
 252  
 253  
 254  
 255  
 256  
 257  
 258  
 259  
 260  
 261  
 262  
 263  
 264  
 265  
 266  
 267  
 268  
 269  
 270  
 271

**Figure S1. Overview of RB-TnSeq Vector pHLL250.** A. Vector diagram of transposition donor vector, pHLL250. The transposable region is highlighted in gray, containing upstream and downstream inverted repeat sites (black), kanamycin resistant marker, *kanR* (green), and a library of N20 DNA barcodes with flanking BarSeq priming regions (rainbow). In front of the barcode is a T7 promoter to minimize polar effects in the forward orientation (see B). The vector also contains ampicillin resistance marker, *ampR* (purple), host-limited origin of replication R6K (maroon), conjugative transfer element, *oriT* (peach), and transposon *himar1* (orange). For more details on how RB-TnSeq and how the parts shown here work, please refer to (20, 21). The exact sequence of this vector can be found at <https://benchling.com/s/seq-gtuLW5A04BN23wfpXFGo>. B. Example of forward orientation insertion in the Salmonella genome (genes shown in turquoise). The transposed element is highlighted in gray and the recorded position from RB-TnSeq corresponds to the black triangle. Per insertion event, the rainbow barcode is represented by a single variant. C. Example of reverse orientation insertion in the Salmonella genome (genes shown in turquoise). The transposed element is highlighted in gray and the recorded position from RB-TnSeq corresponds to the black triangle. Per insertion event, the rainbow barcode is represented by a single variant.

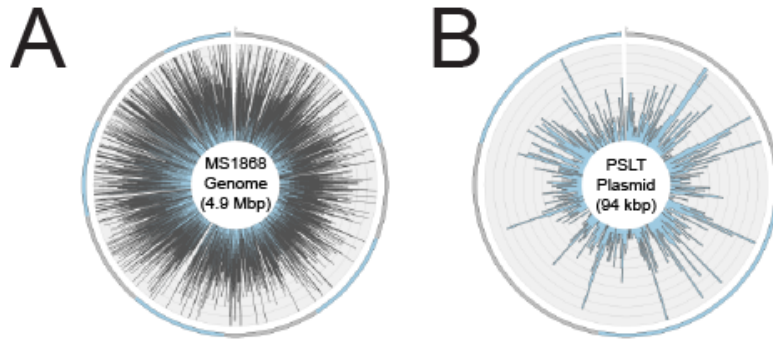

272  
 273  
 274  
 275  
 276  
 277  
 278  
 279

**Figure S2. Overview of RB-TnSeq Insertions in *S. Typhimurium* MS1868.**

Insertion density maps of new RB-TnSeq library in *S. Typhimurium* MS1868 mapped against *S. Typhimurium* LT2 reference genome (A) and PSLT plasmid (B). The gap in insertion density in quadrant III against the *S. Typhimurium* LT2 reference genome is attributed to the absence of prophage Fels2 in MS1868 relative to the LT2 reference genome(36). Input data for Figure S2 can be found in Supplementary Code - Supplemental\_Figure\_S2A.



280  
 281  
 282

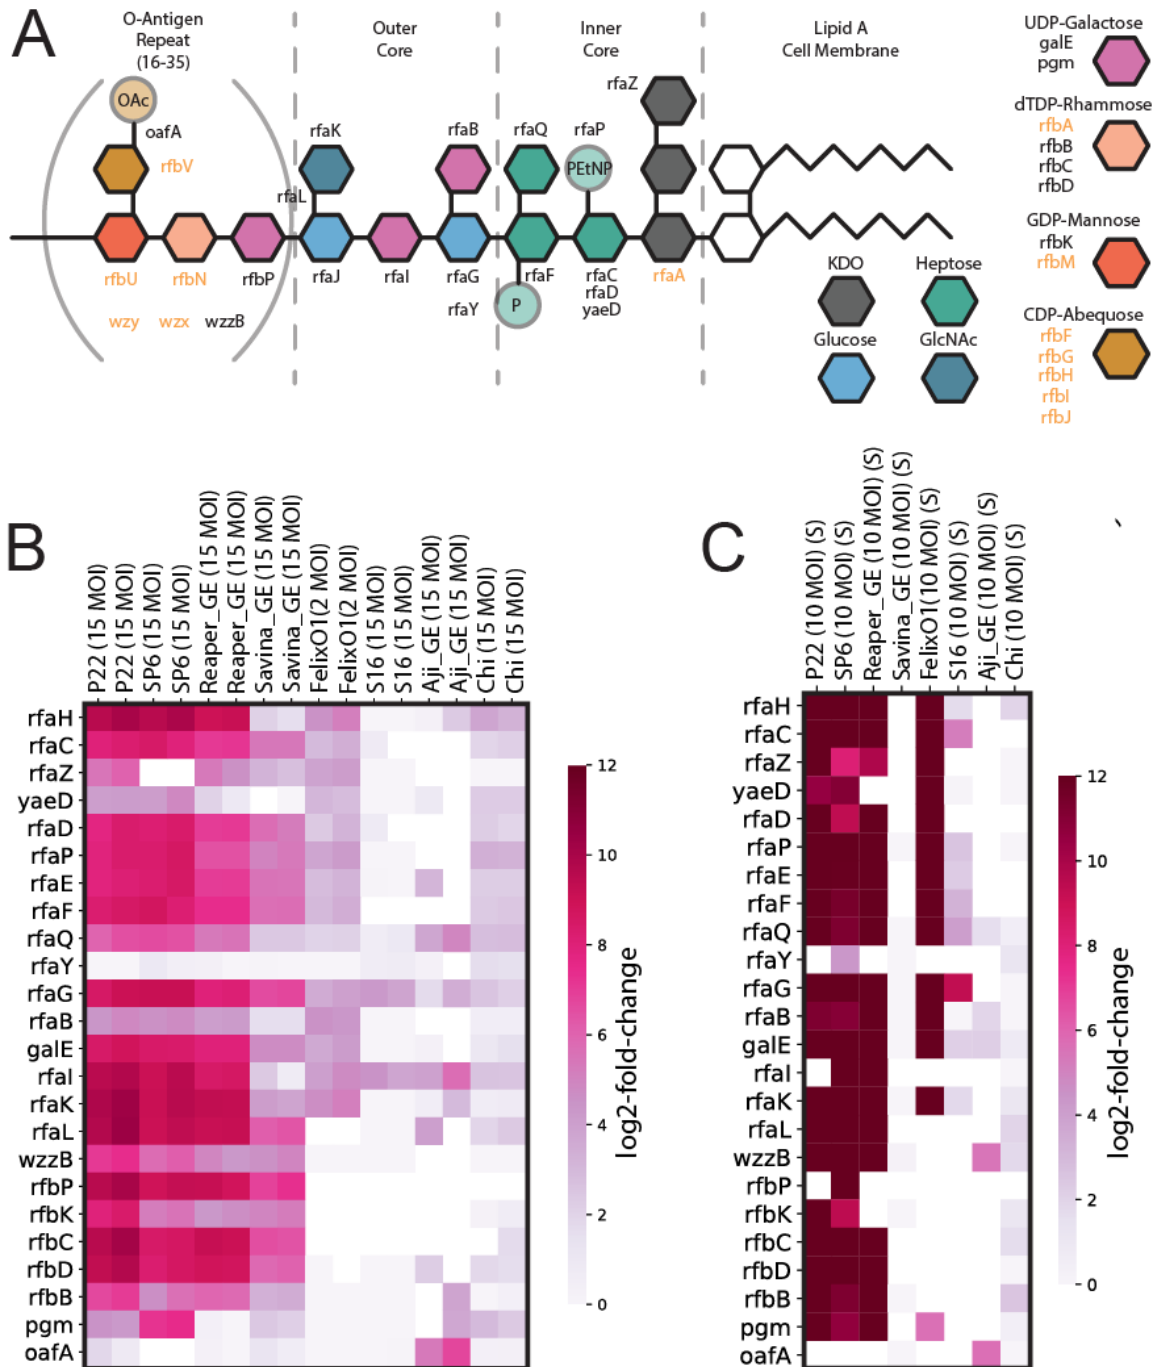

283  
 284  
 285  
 286  
 287  
 288

**Figure S3. Diverse LPS-Specificity Requirements for Bacteriophages Characterized in this Study.**

(A) Overview of O5 S. Typhimurium LPS and O-antigen biosynthesis as characterized previously. The four sugars in brackets comprise the O-antigen, which repeats 16-35 times per LPS molecule under standard growth conditions. Key for non-essential LPS and O-antigen precursor

289 biosynthesis genes are described to the right. Genes covered in our library and used for analysis  
290 are written in black. Genes not covered in our library, and thus not analyzed in this study are  
291 written in orange. (B) Heatmap overview of gene fitness data for LPS-biosynthesis genes  
292 covered in the MS1868 RB-TnSeq library under liquid growth conditions. Genes with under 25  
293 BarSeq reads in the phage samples had their fitness values set to 0 for visualization purposes.  
294 (C) Heatmap overview of gene fitness data for LPS-biosynthesis genes covered in the MS1868  
295 RB-TnSeq library under solid media fitness conditions. Genes with under 25 BarSeq reads in the  
296 phage samples had their fitness values set to 0 for visualization clarity. Input data for Figures S3B  
297 and S3C are found in Dataset S4 and can be recreated using Supplementary Code -  
298 Supplemental\_Figure\_S3BC.  
299

300  
301

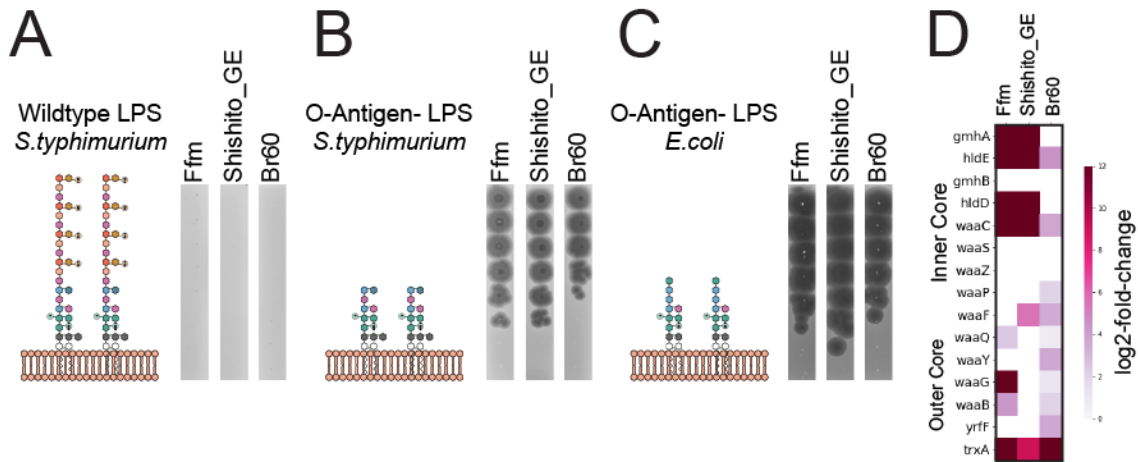

302  
303  
304  
305  
306  
307  
308  
309  
310  
311  
312  
313  
314  
315  
316  
317  
318  
319  
320

**Figure S4. Characterization of Ffm, Shishito\_GE, and Br60 Adsorption Through Comparative RB-TnSeq Library Analysis.**

(A) Overview of LPS structure in smooth, O5 *S. Typhimurium* (key in Figure S3A) and representative plaque assays of Ffm, Shishito\_GE, and Br60. Presumably rough-LPS requiring phage cannot access their true receptor due to presence of O-Antigen. (B) Overview of LPS structure in rough LPS, O5 *S. Typhimurium* (*rfaL* mutant). Rough-LPS *S. Typhimurium* strains (lacking O-antigen) show efficient phage infection. (C) Overview of rough-LPS structure in, *E. coli* BW25113 (same key in Fig S3A), which shares most of the residues in inner and outer core as rough-LPS *Salmonellae*. Despite host phylogenetic distance, we observe that Ffm, Shishito\_GE, and Br60 phages efficiently infect *E. coli* BW25113. (D) Heatmap overview of functional data for LPS-biosynthesis genes covered in the *E. coli* BW25113 RB-TnSeq library under short-time-adsorption conditions on solid media for rough-LPS requiring phages Ffm, Shishito\_GE, and Br60. Genes with under 25 BarSeq reads in the phage samples had their fitness values set to 0 for visualization purposes. Input data for Figure S4D are found in Dataset S4 and can be recreated using Supplementary Code - Supplemental\_Figure\_S4D.

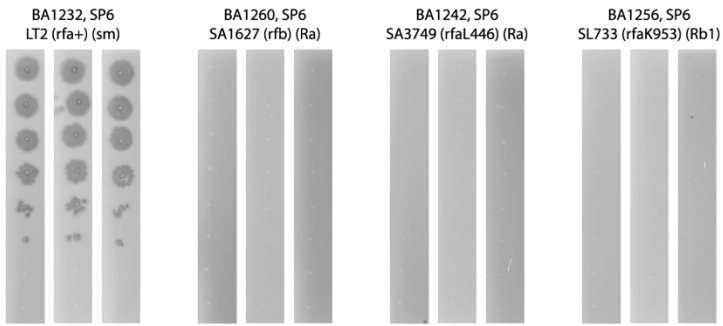

321  
 322  
 323  
 324  
 325

**Figure S5. LPS Chemotype Validations for Phage SP6**

Plaque assays for phage SP6 against a subset of *Salmonella* LPS mutants. Chemotypes for these strains have been identified previously and were supplied by the *Salmonella* Genetic Stock Center. Three biological replicates from unique days are shown.

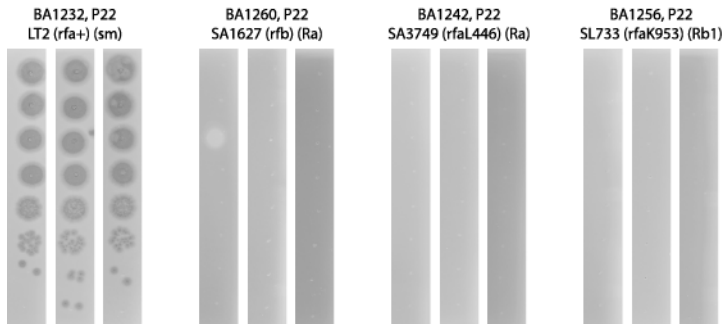

326  
327  
328  
329  
330

**Figure S6. LPS Chemotype Validations for Phage P22.**

Plaque assays for phage P22 against a subset of *Salmonella* LPS mutants. Chemotypes for these strains have been identified previously and were supplied by the *Salmonella* Genetic Stock Center. Three biological replicates from unique days are shown.

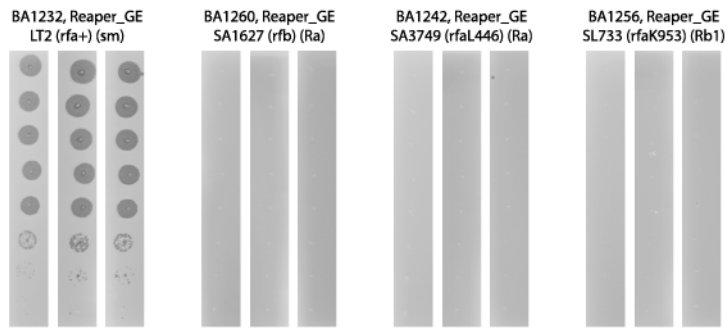

331

332

**Figure S7. LPS Chemotype Validations for Phage Reaper\_GE\_8C2.**

333

Plaque assays for phage Reaper\_GE\_8C2 against a subset of *Salmonella* LPS mutants.

334

Chemotypes for these strains have been identified previously and were supplied by the

335

*Salmonella* Genetic Stock Center. Three biological replicates from unique days are shown.

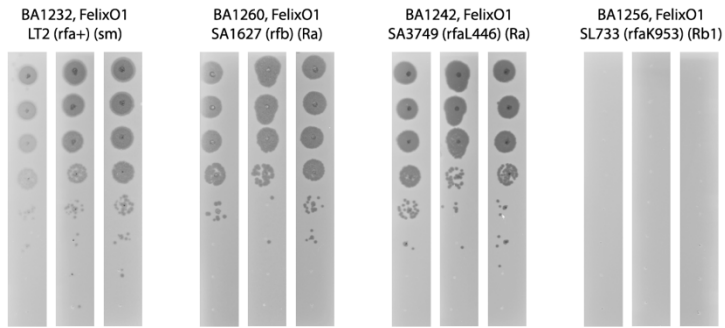

336  
 337  
 338  
 339  
 340

**Figure S8. LPS Chemotype Validations for Phage FelixO1.** Plaque assays for phage FelixO1 against a subset of *Salmonella* LPS mutants. Chemotypes for these strains have been identified previously and were supplied by the *Salmonella* Genetic Stock Center. Three biological replicates from unique days are shown.

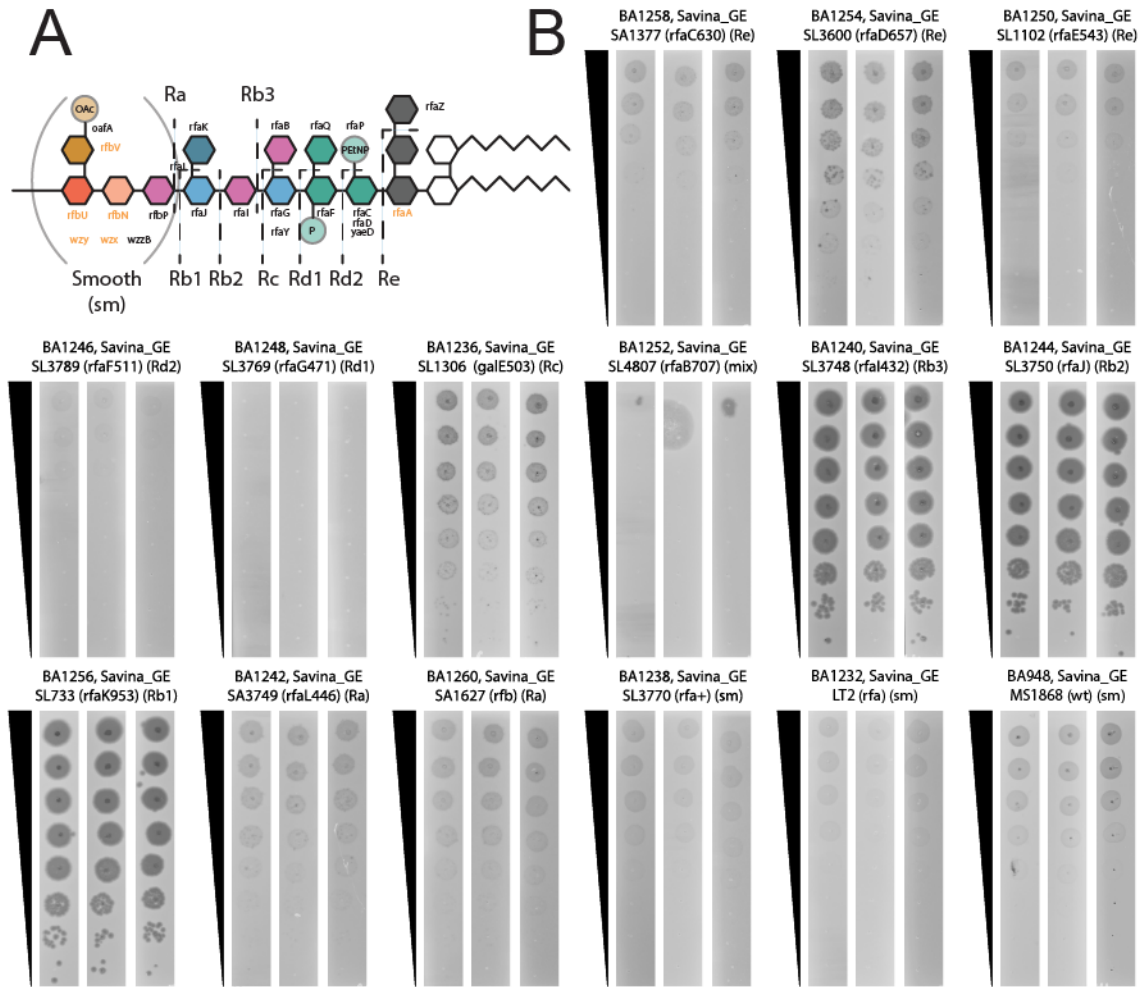

341  
 342  
 343  
 344  
 345  
 346

**Figure S9. LPS Chemotype Specificity Tests for Phage Savina\_GE\_6H2.**

A. Overview of LPS structure in *S. typhimurium* LT2 with chemotype annotations depicted.

B. Plaque assays for phage Savina\_GE\_6H2 against a panel of *Salmonella* LPS mutants. Chemotypes for these strains have been identified previously and were supplied by the *Salmonella* Genetic Stock Center. Three biological replicates from unique days are shown.



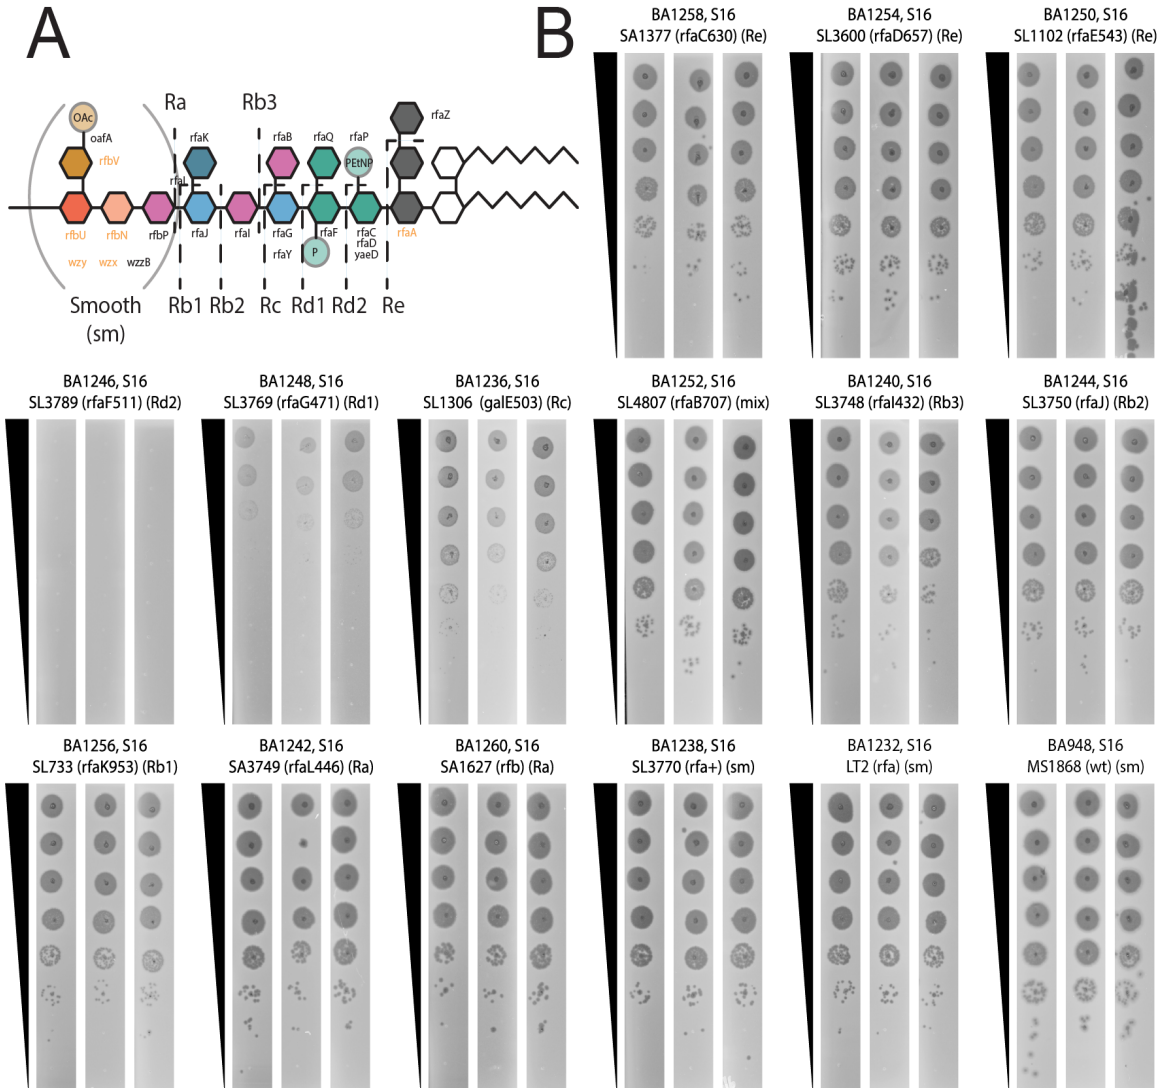

347  
 348  
 349  
 350  
 351  
 352

**Figure S10. LPS Chemotype Specificity Tests for Phage S16.**

A. Overview of LPS structure in *S. Typhimurium* LT2 with chemotype annotations depicted.  
 B. Plaque assays for phage S16 against a panel of *Salmonella* LPS mutants. Chemotypes for these strains have been identified previously and were supplied by the *Salmonella* Genetic Stock Center. Three biological replicates from unique days are shown.

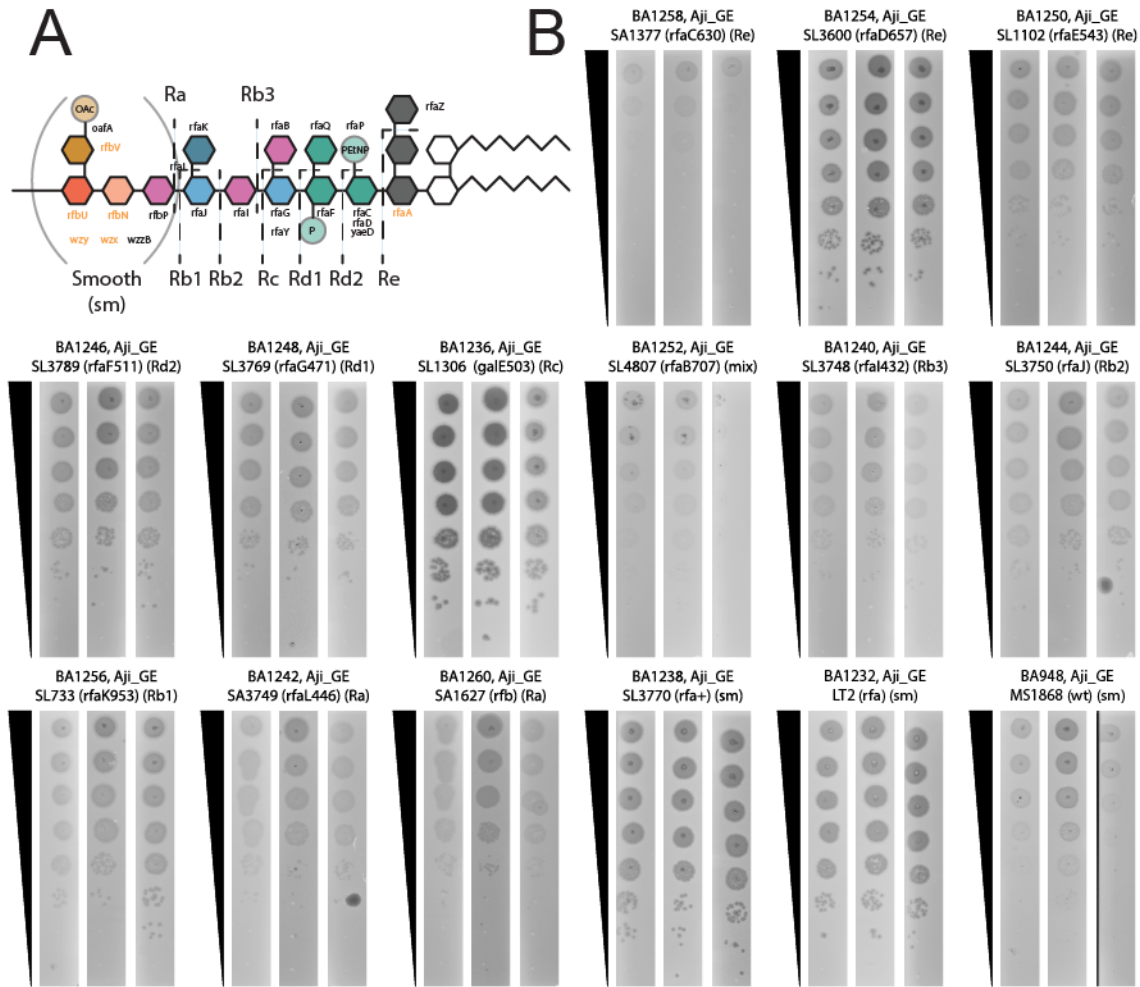

353  
 354  
 355  
 356  
 357  
 358

**Figure S11. LPS Chemotype Specificity Tests for Phage Aji\_GE\_EIP16.**

A. Overview of LPS structure in *S. Typhimurium* LT2 with chemotype annotations depicted.  
 B. Plaque assays for phage Aji\_GE\_EIP16 against a panel of *Salmonella* LPS mutants. Chemotypes for these strains have been identified previously and were supplied by the *Salmonella* Genetic Stock Center. Three biological replicates from unique days are shown.

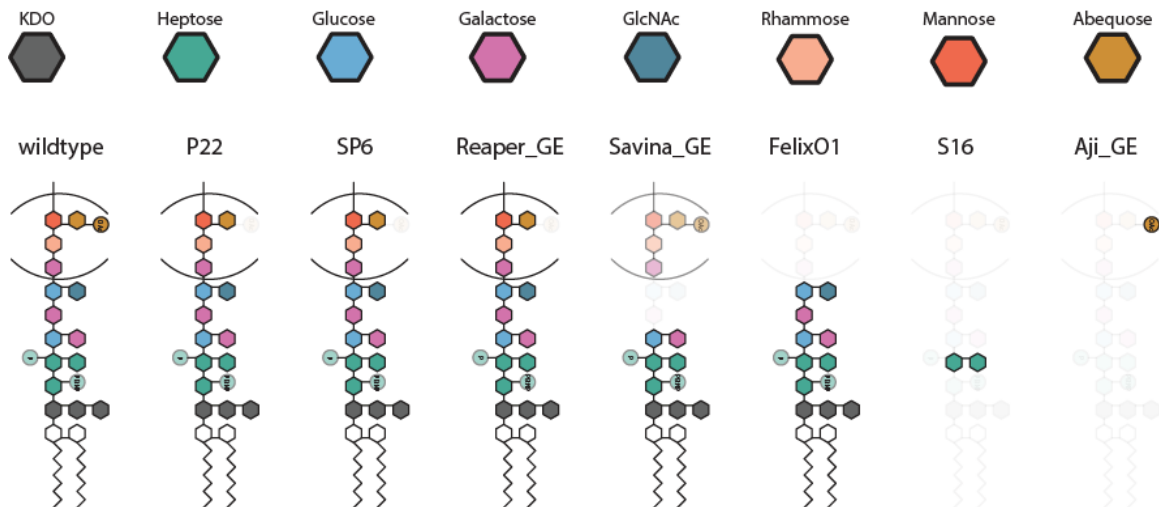

359

360

361

362

363

364

365

**Figure S12. Diversity of LPS Phage Resistance Factors.** Rendition of LPS-receptor for different *Salmonella* bacteriophages based on RB-TnSeq fitness values (Fig 2BC) and validations from a defined chemotype panel (S2-S8 Figs). For the modification catalyzed by OafA, a new gene replacement mutant was employed. Opaque sugar residues are strictly required for phage infection, lighter sugar and PTM residues are not required. Color key for LPS and O-antigen precursor biosynthesis sugars are shown at the top.

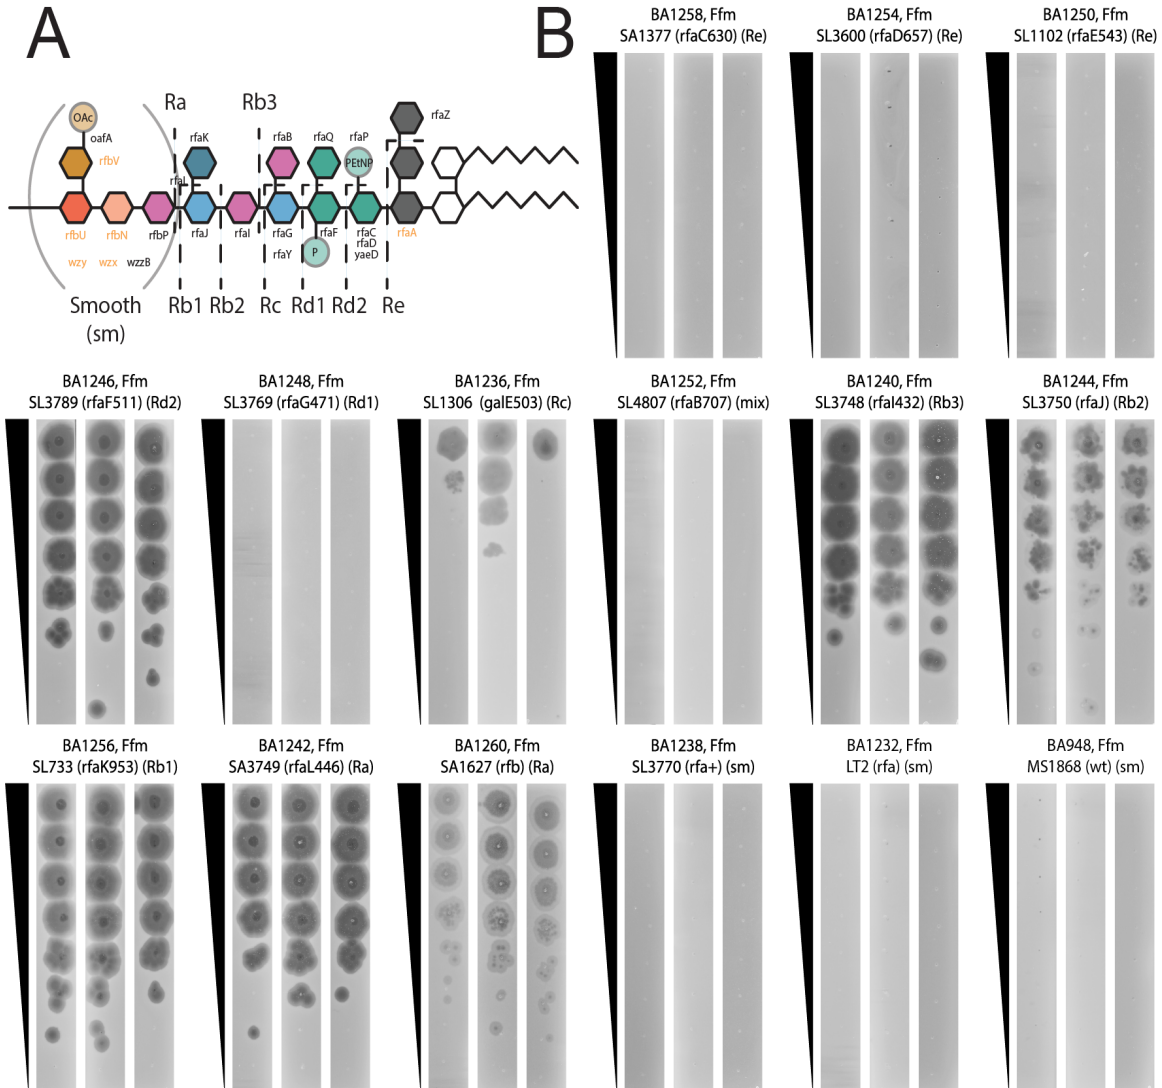

366  
 367  
 368  
 369  
 370  
 371

**Figure S13. LPS Chemotype Specificity Tests for Phage Ffm.**

A. Overview of LPS structure in *S. Typhimurium* LT2 with chemotype annotations depicted.  
 B. Plaque assays for phage Ffm against a panel of *Salmonella* LPS mutants. Chemotypes for these strains have been identified previously and were supplied by the *Salmonella* Genetic Stock Center. Three biological replicates from unique days are shown.

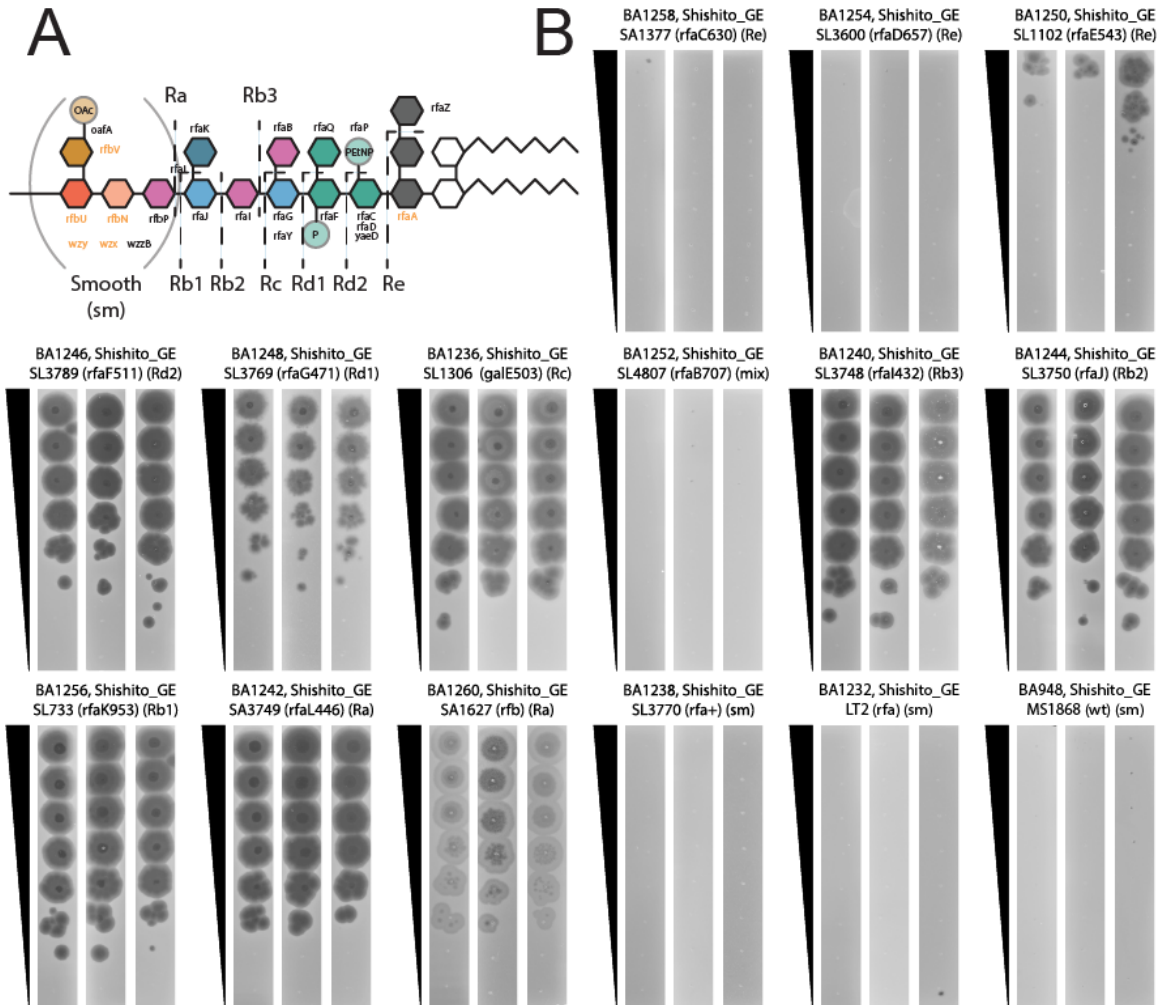

372  
 373  
 374  
 375  
 376  
 377  
 378

**Figure S14. LPS Chemotype Specificity Tests for Phage Shishito\_GE\_6F2.**

A. Overview of LPS structure in *S. Typhimurium* LT2 with chemotype annotations depicted.  
 B. Plaque assays for phage Shishito\_GE\_6F2 against a panel of *Salmonella* LPS mutants. Chemotypes for these strains have been identified previously and were supplied by the *Salmonella* Genetic Stock Center. Three biological replicates from unique days are shown.

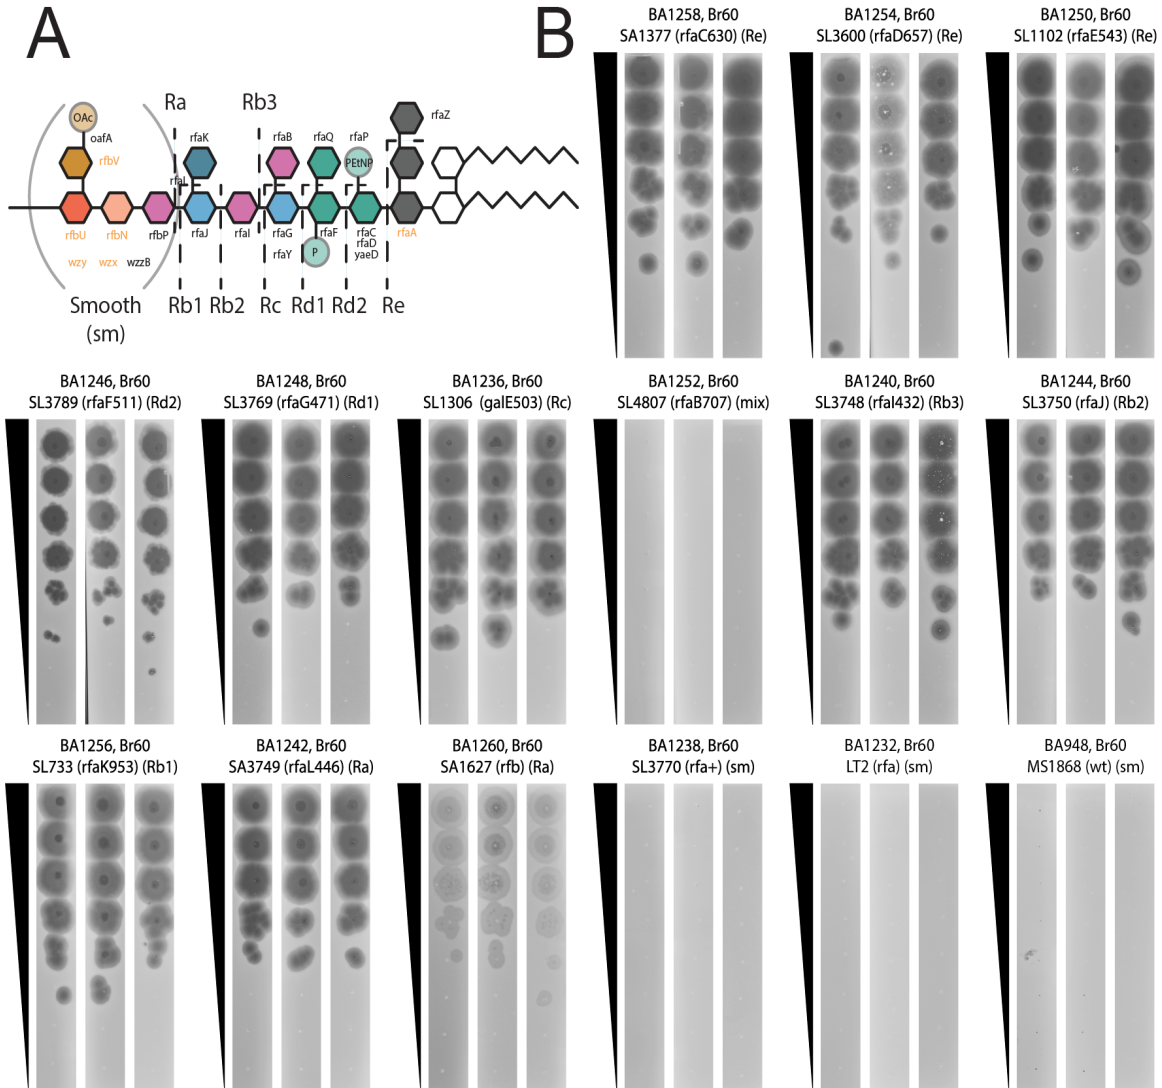

379  
 380  
 381  
 382  
 383  
 384  
 385

**Figure S15. LPS Chemotype Specificity Tests for Phage Br60.**

A. Overview of LPS structure in *S. Typhimurium* LT2 with chemotype annotations depicted.  
 B. Plaque assays for phage Br60 against a panel of *Salmonella* LPS mutants. Chemotypes for these strains have been identified previously and were supplied by the *Salmonella* Genetic Stock Center. Three biological replicates from unique days are shown.

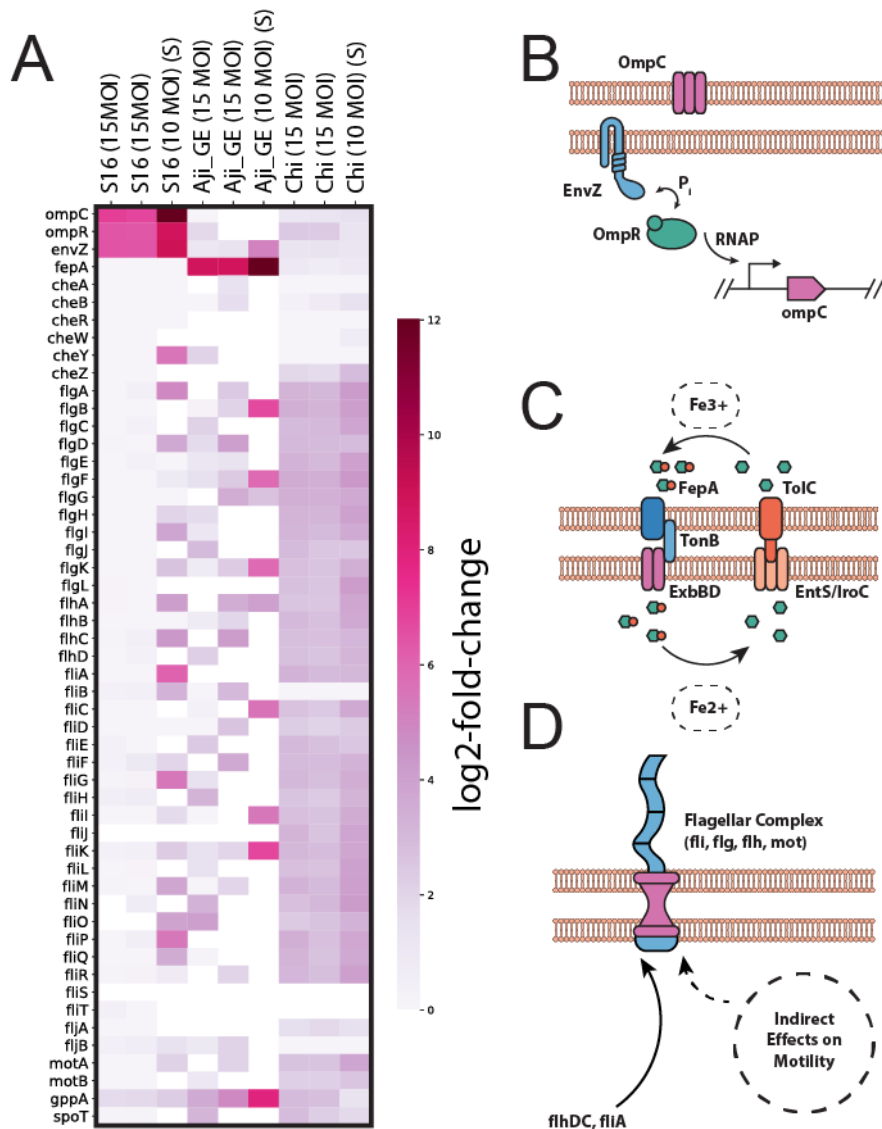

386  
 387  
 388  
 389  
 390  
 391  
 392  
 393  
 394  
 395  
 396  
 397  
 398  
 399  
 400  
 401  
 402

**Figure S16. Diverse protein receptors and their regulation observed for bacteriophages characterized in this study.**

(A) Heatmap overview of gene fitness data for putative protein receptors and their regulators in experiments against the MS1868 RB-TnSeq library under liquid and solid growth conditions. Noncompetitive, solid agar growth experiments are marked with a (S). Genes with under 25 BarSeq reads in the phage samples had their fitness values set to 0 for visualization purposes.

(B) Schematic overview for OmpC regulation observed against phage S16. Two component system EnvZ-OmpR positively regulates expression of OmpC. If EnvZ or OmpR are disrupted, lower levels of OmpC are expressed.

(C) Schematic overview for FepA, a critical host-requirement for phage Aji\_GE\_EIP16. FepA mediates iron scavenging through import of Fe-enterobactin and is indirectly regulated by internal iron levels.

(D) Schematic overview for flagellar regulation and activity observed against phage Chi. The type I flagellar complex is assembled from proteins expressed from the multiple *flg*, *fli*, *flh*, and *mot* operons. Disruption of positive flagellar biosynthesis regulators *flhD*, *flhC*, and *fliA* hinders Chi infection, while disruption of negative flagellar biosynthesis regulators, *fliT* and *flgM* do not. Phase II flagellar genes *fliJAB* do not appear to important for Chi infection. Other motility promoting genes such as *cheZ* are

403 important for Chi infection as well. Input data for Figure S16A is found in Dataset S4 and can be  
404 recreated using Supplementary Code - Supplemental\_Figure\_S16A.  
405



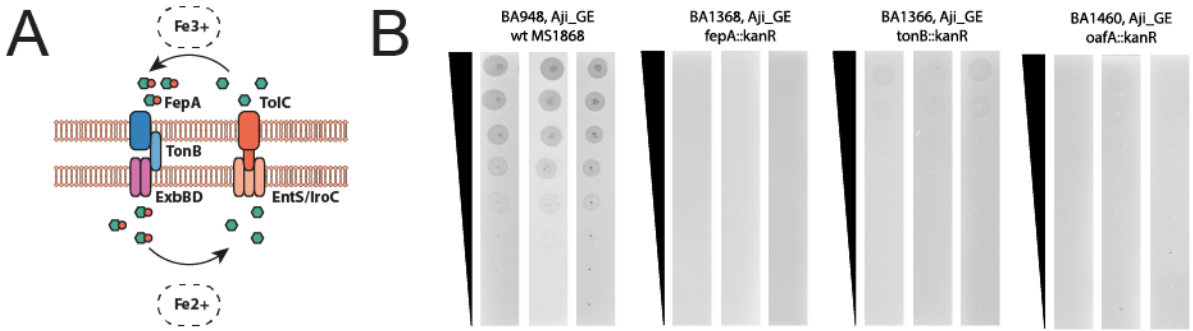

406  
407  
408  
409  
410  
411

**Figure S17. Aji\_GE\_EIP16 Followups**

A. Overview of FepA-TonB complex in *S. Typhimurium* LT2.

B. Plaque assays for phage Aji\_GE\_EIP16 against putative-receptor *Salmonella* mutants. Genotypes for these strains are described. Three biological replicates from unique days are shown.

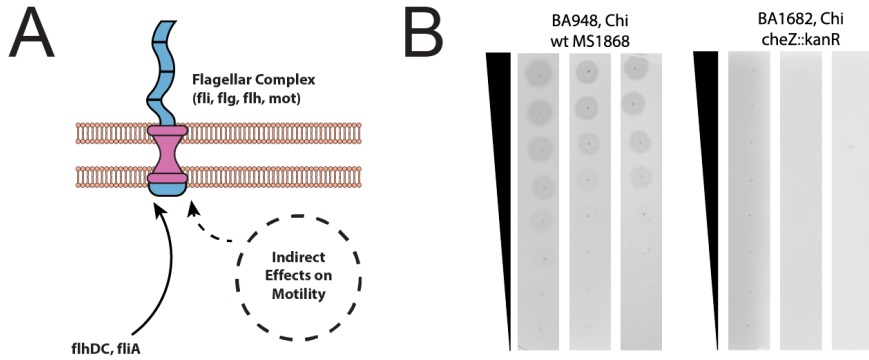

412

413

**Figure S18. Chi Followups**

414

A. Overview of Flagellar complex in *S. Typhimurium* LT2.

415

B. Plaque assays for phage Chi against wildtype and *Salmonella cheZ* mutant. Genotypes for

416

these strains are described. Three biological replicates from unique days are shown.

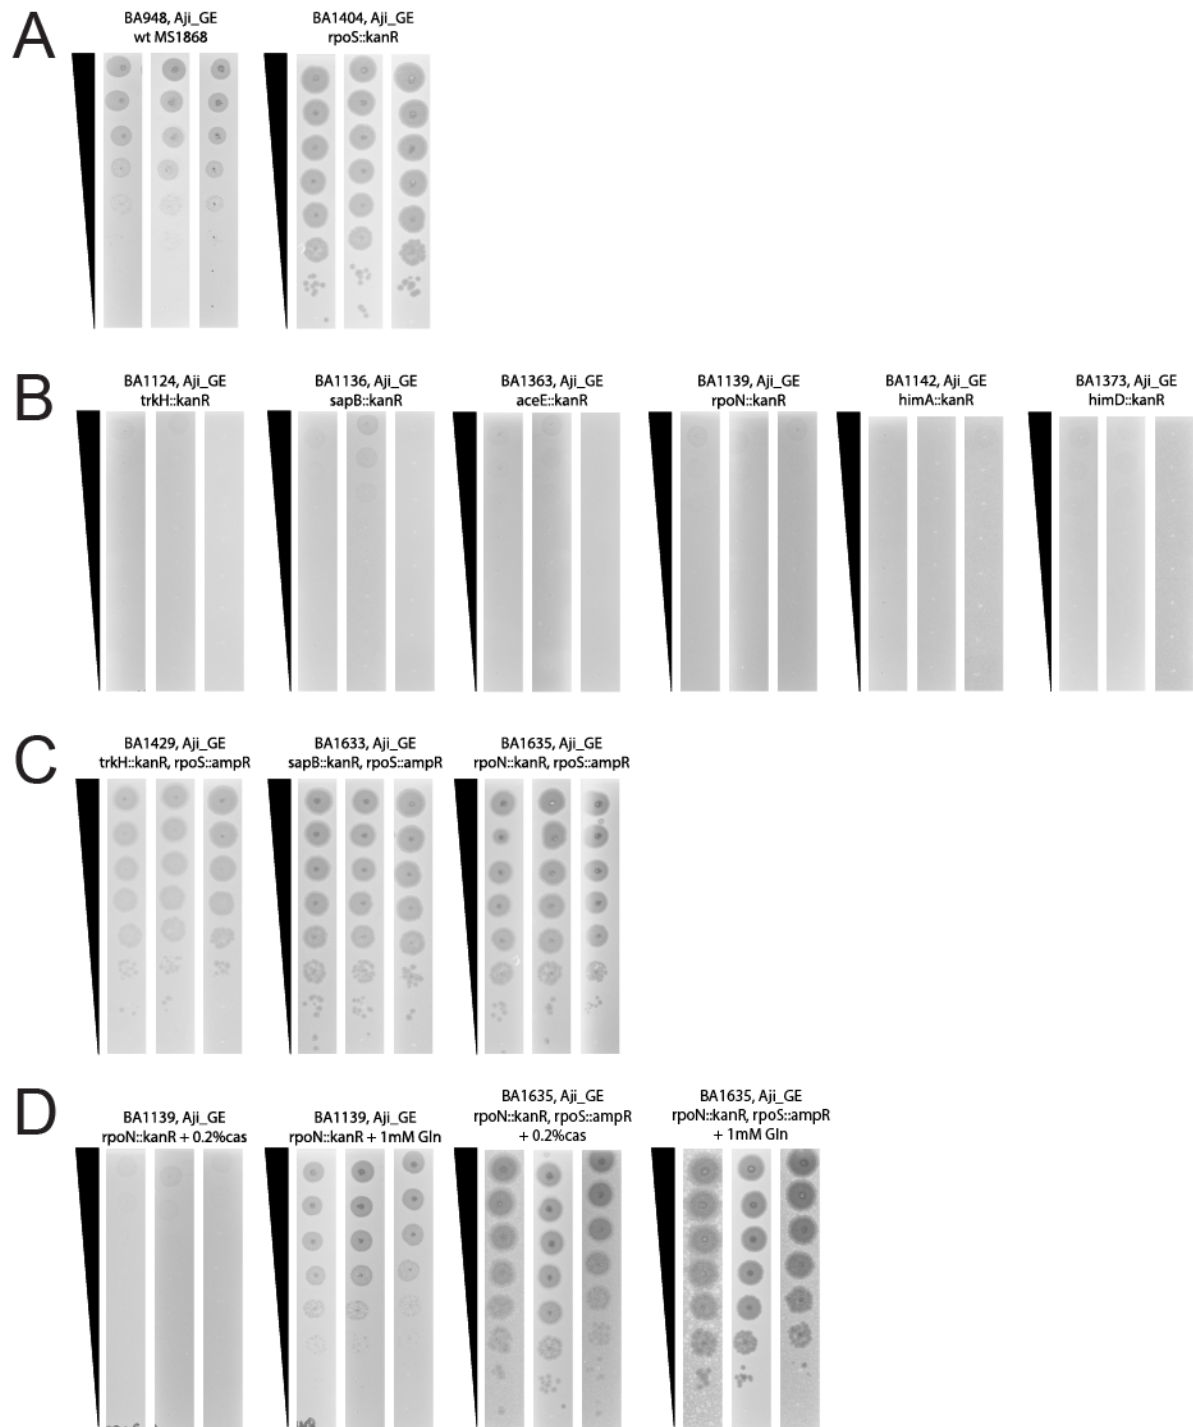

417

418

**Figure S19. Aji\_GE\_EIP16 Followups for Cross-Resistance Mutants.**

419

Plaque assays for phage Aji\_GE\_EIP16 against mutants identified in phage cross-resistance. In all panels, genotypes for the strains are described. Three biological replicates from unique days are shown.

420

421

422

A. Aji\_GE\_EIP16 against wildtype and *Salmonella rpoS* mutant.

423

B. Aji\_GE\_EIP16 plated against single deletions of cross-resistant genes.

424

C. Aji\_GE\_EIP16 plated against double deletions of cross-resistant genes and *rpoS*.

425 D. Aji\_GE\_EIP16 plated against *rpoN* and *rpoN*, *rpoS* mutants supplemented with casamino  
426 acids or glutamine.

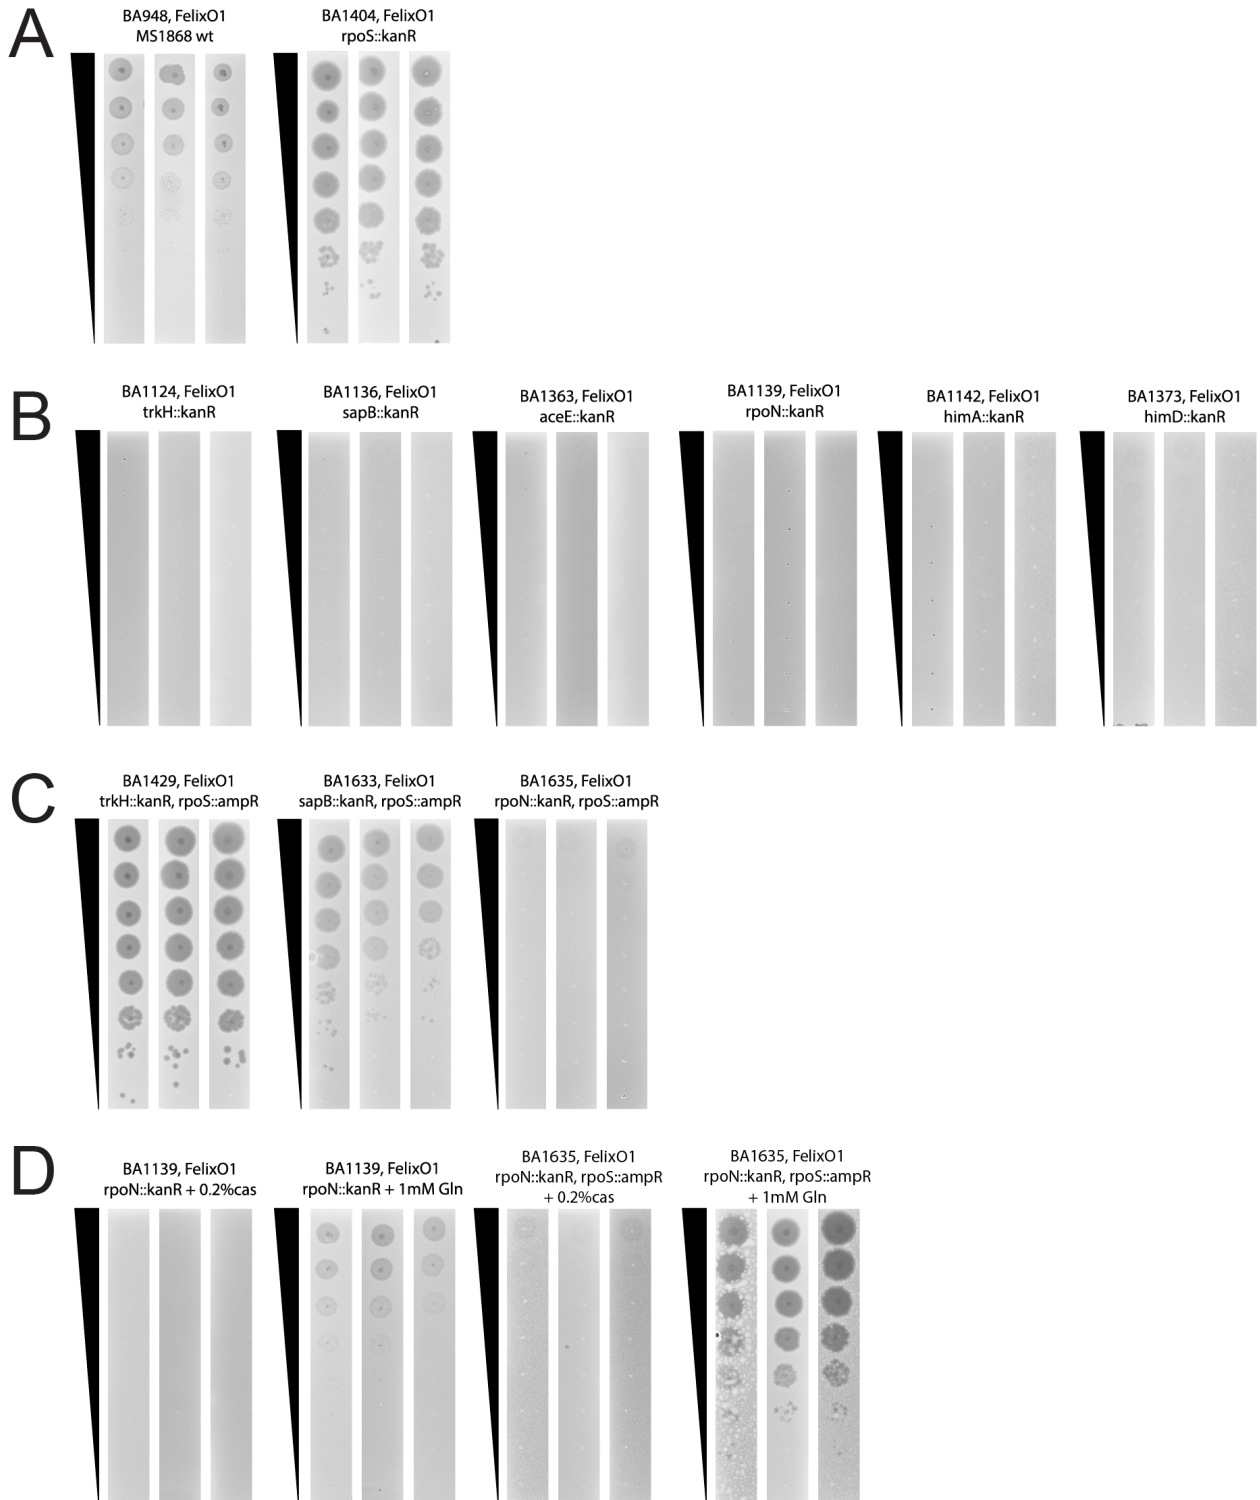

427

428

**Figure S20. FelixO1 Followups for Cross-Resistance Mutants**

429

Plaque assays for phage FelixO1 against mutants identified in phage cross-resistance. In all

430

panels, genotypes for the strains are described. Three biological replicates from unique days are

431

shown.

432

A. FelixO1 against wildtype and *Salmonella rpoS* mutant.

433

B. FelixO1 plated against single deletions of cross-resistant genes.

- 434 C. FelixO1 plated against double deletions of cross-resistant genes and *rpoS*.  
435 D. FelixO1 plated against *rpoN* and *rpoN*, *rpoS* mutants supplemented with casamino acids or  
436 glutamine.

437 Table S1. Overview of the *S. Typhimurium* MS1868 RB-TnSeq Library<sup>1</sup>

| <b>Barcode-Level Statistics</b>                    |        |
|----------------------------------------------------|--------|
| Total Number of Barcodes                           | 66,996 |
| Barcodes Associated with a Unique Gene             | 55,675 |
| Barcodes Analyzed <sup>2</sup>                     | 49,655 |
| Mean Barcodes per Gene-Used                        | 14.8   |
| Median Barcodes per Gene-Used                      | 12.0   |
| <b>Gene-Level Statistics</b>                       |        |
| Genes in MS1868 <sup>3</sup>                       | 4610   |
| Genes Mutated                                      | 3759   |
| Genes Mutated - Primary Chromosome                 | 3670   |
| Genes Mutated - PSLT Plasmid                       | 89     |
| Genes Without Mutants                              | 851    |
| Known Genes Without Unique Mapping <sup>4</sup>    | 23     |
| Likely Essential Genes <sup>5</sup>                | 434    |
| Likely Nonessential Genes <sup>4</sup>             | 380    |
| MS1868-Specific Genes Without Mutants <sup>4</sup> | 17     |

438

<sup>1</sup> The gene-level data for these summary statistics can be found in Dataset S1 and created by Supplementary Code - Supplemental\_Dataset\_S1\_Table\_S1.

<sup>2</sup> Barcodes analyzed are barcodes uniquely associated with a gene annotation located and are mapped between the 5-95% of the gene annotation.

<sup>3</sup> *S. Typhimurium* MS1868 is an *S. Typhimurium* LT2-derived strain, so *S. Typhimurium* LT2 was used as a reference, exempting the 45 genes from Fels2 prophage (cured from *S. Typhimurium* MS1868). The following Refseq accessions were used to describe gene annotations: NC\_003197.2, NC\_003277.2.

<sup>4</sup> Genes STM2621-STM2634 from Gifsy1 prophage are perfectly duplicated in STM1007-STM1019 from Gifsy2 in LT2-derived strains. Thus, any barcodes mapped to these regions could not be uniquely mapped and analyzed.

<sup>5</sup> Comparison made to the transposon-mutagenesis derived *S. Typhimurium* 14028 single gene collection described in Porwollik et al., 2014 (37). Likely essential genes were defined as genes neither mutated in the MS1868 library nor in the 14028 library. MS1868-Specific Genes Without Mutants are genes unique to strain MS1868 that are not present in strain 14028.

439 *Table S2. Known and Unique hits per phage per screen*  
 440 Summary of known and new hits per phage per screen. Total host factors reported here are the  
 441 total number of genes that meet the thresholds reported in S5 Dataset following manual curation.  
 442 For details concerning how manual curation was performed, see Materials and Methods.

| <b>S. Typhimurium MS1868 RB-TnSeq screen: Total hits 283</b> |                    |                     |                     |
|--------------------------------------------------------------|--------------------|---------------------|---------------------|
| Phage                                                        | Total host factors | Unique host factors | Previously Reported |
| Aji_GE_EIP16                                                 | 34                 | 34                  | N/A                 |
| Br60                                                         | NA                 | NA                  | NA                  |
| Chi                                                          | 98                 | 90                  | 8                   |
| FelixO1                                                      | 73                 | 61                  | 12                  |
| Ffm                                                          | NA                 | NA                  | NA                  |
| P22                                                          | 20                 | 6                   | 14                  |
| Reaper_GE_8C2                                                | 16                 | 16                  | N/A                 |
| S16                                                          | 7                  | 4                   | 3                   |
| Savina_GE_6H2                                                | 15                 | 15                  | N/A                 |
| Shishito_GE_6F2                                              | NA                 | NA                  | N/A                 |
| SP6                                                          | 20                 | 20                  | 0                   |
| <b>E. coli K-12 BW25113 RB-TnSeq screen: Total hits 18</b>   |                    |                     |                     |
| Phages                                                       | Total host factors | Newly Reported      | Previously Reported |
| Br60                                                         | 1                  | 1                   | 0                   |
| Ffm                                                          | 10                 | 3                   | 7                   |
| Shishito_GE_6F2                                              | 7                  | 7                   | N/A                 |

443



444 Table S3. Primers used in this study.

| Primer Number | Primer Name                  | Purpose                                        | Sequence                                                                                                 |
|---------------|------------------------------|------------------------------------------------|----------------------------------------------------------------------------------------------------------|
| oBA1007       | oBA1007_1100R                | 16S verification primers                       | GGGTTGCGCTCGTTG                                                                                          |
| oBA1008       | oBA1008_337F                 | 16S verification primers                       | GACTCCTACGGGAGGCWGCAG                                                                                    |
| oBA757        | oBA757_GFF276_KanR_KO_F      | Recombineering template<br>$\Delta$ trkH::kanR | GTTAGCGATTGAAGAATAATCCCCACCT<br>CATTTTTAAGAATAAAGGAAGCGGCAG<br>AGATGCTGATCCTTCAACTCAGCAAAA<br>GTTTCGATT  |
| oBA758        | oBA758_GFF276_KanR_KO_R      | Recombineering template<br>$\Delta$ trkH::kanR | CAATTTTCGCGGTTTTGTCCGTCCCGGG<br>TAGAGAAAAGAATCAATGTTTTTCACGTG<br>TTACTCCATTAGAGTCCCGTCAAGTCAG<br>CGTAATG |
| oBA769        | oBA769_GFF2689_KanR_KO_F     | Recombineering template<br>$\Delta$ sapB::kanR | AATGCGTCTTTTGC CGGCGTCTCCCGC<br>GAAAAACACGAAGAGGTGAAAAACCA<br>TGATTACTGATCCTTCAACTCAGCAAAA<br>GTTTCGATT  |
| oBA770        | oBA770_GFF2689_KanR_KO_R     | Recombineering template<br>$\Delta$ sapB::kanR | ACGCCAGGCAGTGCGCAGGGTGCCTG<br>GCGGGCGCTTTTTCGCTGTATACGCTAT<br>CGTAAGGCATACCGAGTCCCGTCAAGT<br>CAGCGTAATG  |
| oBA771        | oBA771_GFF2946_KanR_KO_F     | Recombineering template<br>$\Delta$ rpoN::kanR | CAGACTCTGATAGGGTAGAGGGCTATG<br>CTGCTCTAGCGGGAGAAAACGACTCTG<br>AATATGCTGATCCTTCAACTCAGCAAAA<br>GTTTCGATT  |
| oBA772        | oBA772_GFF2946_KanR_KO_R     | Recombineering template<br>$\Delta$ rpoN::kanR | TCAGTAATTTTCGACATTATGTCCGGTGA<br>TATTGAGCTGCATAGTGTCTTCCTTATC<br>GGTTGGGTCAGAGTCCCGTCAAGTCAG<br>CGTAATG  |
| oBA775        | oBA775_GFF3528_KanR_KO_F     | Recombineering template<br>$\Delta$ himA::kanR | CCAAATGTGTAGAGGCATTAAGAGAGC<br>GATTCCAGGCATCATTGAGGGATTGAA<br>CCTATGCTGATCCTTCAACTCAGCAAAA<br>GTTTCGATT  |
| oBA776        | oBA776_GFF3528_KanR_KO_R     | Recombineering template<br>$\Delta$ himA::kanR | TACTTTTCGGGATGGCAGCGTATCTGCC<br>GCAATACACCCTGATGGATGTTATGCC<br>TGGATCTGATTAGAGTCCCGTCAAGTC<br>AGCGTAATG  |
| oBA964        | oBA964_GFF122_aceE_KanR_KO_R | Recombineering template<br>$\Delta$ aceE::kanR | TCAACTTCATCTGTCCCGATGTCCGGTA<br>CTTTGATTTTCGATAGCCATTATTCTTTTA<br>CCTCTTAGAGTCCCGTCAAGTCAGCGT<br>AATGCT  |

|         |                                |                                                |                                                                                                           |
|---------|--------------------------------|------------------------------------------------|-----------------------------------------------------------------------------------------------------------|
| oBA965  | oBA965_GFF122_aceE_Kan_KO_F    | Recombineering template<br>$\Delta$ aceE::kanR | GGGACAGGTTCCAGATAACTCAACGTA<br>TTAGATAGATAAGGAATACCCCATGCT<br>GATCCTTCAACTCAGCAAAAGTTCGATT<br>TATTCAA     |
| oBA968  | oBA968_GFF2736_tonB_Kan_KO_R   | Recombineering template<br>$\Delta$ tonB::kanR | AAGTATACCCGCTTACGCCGCCAGCAG<br>GTGATGGTATATTCTGGCTGGCGGCG<br>CCAGAGATTAGAGTCCCGTCAAGTCAG<br>CGTAATGCT     |
| oBA969  | oBA969_GFF2736_tonB_Kan_KO_F   | Recombineering template<br>$\Delta$ tonB::kanR | TGCATTTAAAATTCAGCTCTGGTTTTTC<br>AACTGAAACGATTATGACTTCAATGCTG<br>ATCCTTCAACTCAGCAAAAGTTCGATTT<br>ATTCAA    |
| oBA970  | oBA970_GFF4489_fepA_Kan_KO_R   | Recombineering template<br>$\Delta$ fepA::kanR | AATGAGATGTCAGCATCGTTTTTGCCAA<br>TTCCCTCCCCGAATGAGGGAGGGAAG<br>GTTGCCATCAGAGTCCCGTCAAGTCAG<br>CGTAATGCT    |
| oBA971  | oBA971_GFF4489_fepA_Kan_KO_F   | Recombineering template<br>$\Delta$ fepA::kanR | TTGACGGGCGCTTTGGCTTATGTGGCT<br>AAAGAAAAGCAGGATATACAATGAACC<br>TGATCCTTCAACTCAGCAAAAGTTCGAT<br>TTATTCAA    |
| oBA972  | oBA972_GFF4489_rpoS_Kan_KO_R   | Recombineering template<br>$\Delta$ rpoS::kanR | CAGAAGACAAACGGTAAAAAAAAGGCC<br>AGTCGACAGACTGGCCTTTTTTTGACAA<br>GGGTACTIONTAGAGTCCCGTCAAGTCAGC<br>GTAATGCT |
| oBA973  | oBA973_GFF4489_rpoS_Kan_KO_F   | Recombineering template<br>$\Delta$ rpoS::kanR | AGGCTTTGACTTGCTAGTTCGTCAGG<br>GGATCACGGGTAGGAGCCACCTTTTGC<br>TGATCCTTCAACTCAGCAAAAGTTCGAT<br>TTATTCAA     |
| oBA978  | oBA978_GFF3669_ihfB_Kan_KO_R   | Recombineering template<br>$\Delta$ ihfD::kanR | CGTATAAATGAAAAAAGCACCCCTGACG<br>GTGCTTTTTTCGGGTTCAAGTTTTGCGT<br>TAAACTTAGAGTCCCGTCAAGTCAGC<br>GTAATGCT    |
| oBA979  | oBA979_GFF3669_ihfB_Kan_KO_F   | Recombineering template<br>$\Delta$ ihfD::kanR | ATCAATCTCACGGCTGCAGCCAATTTG<br>CCTTTAAGGAACCGGAGGAATCATGCT<br>GATCCTTCAACTCAGCAAAAGTTCGATT<br>TATTCAAC    |
| oBA1030 | oBA1030_GFF4489_rpoS_ampR_KO_F | Recombineering template<br>$\Delta$ rpoS::ampR | ACTTGCTAGTTCGTCAGGGATCAGC<br>GGTAGGAGCCACCTTTTGTAAACCCTG<br>ATAAATGCTTCAATAATATTGAAAAAGG<br>AAGAGTAT      |
| oBA1031 | oBA1031_GFF4489_rpoS_ampR_KO_R | Recombineering template<br>$\Delta$ rpoS::ampR | AGACAAACGGTAAAAAAAAGGCCAGTC<br>GACAGACTGGCCTTTTTTTGACAAGGG<br>TACTTATTACCAATGCTTAATCAGTGAG                |

|         |                                 |                                                |                                                                                                            |
|---------|---------------------------------|------------------------------------------------|------------------------------------------------------------------------------------------------------------|
|         |                                 |                                                | GCACCTAT                                                                                                   |
| oBA1073 | oBA1073_STM223_2_oafA_KanR_KO_F | Recombineering template<br>$\Delta$ oafA::kanR | ATCCATTATCTTAATTTTCGTCTTGTGTG<br>GCACCTTGGGAATTATAGGTAAAAAATGC<br>TGATCCTTCAACTCAGCAAAAAGTTTCGAT<br>TTATTC |
| oBA1074 | oBA1074_STM223_2_oafA_KanR_KO_R | Recombineering template<br>$\Delta$ oafA::kanR | ATAAAATAATTTGCATTATTGTTGTAGTT<br>TTATAAAATAAAAAGAGGGGCAAGCCC<br>CTCTGTTTAGAGTCCCGTCAAGTCAGC<br>GTAATGC     |
| oBA779  | oBA779_GFF276_Nterm_check_F     | Verification primers: trkH<br>locus            | GCCATTAACCGAATATACTTTGCAGTGT<br>GAG                                                                        |
| oBA1192 | oBA1192_trkH_DS_R               | Verification primers: trkH<br>locus            | GCGCCAATCACTACGCGATCATAGC                                                                                  |
| oBA785  | oBA785_2689_Nterm_check_F       | Verification primers: sapB<br>locus            | GGAGAAAGAGCTGCCGATACTGCC                                                                                   |
| oBA1193 | oBA1193_sapB_DS_R               | Verification primers: sapB<br>locus            | CAGACCGGCGCATCCATACAGAC                                                                                    |
| oBA786  | oBA786_2946_Nterm_check_F       | Verification primers: rpoN<br>locus            | GAACGCGCCTATATCGTGAGCCA                                                                                    |
| oBA1194 | oBA1194_rpoN_DS_R               | Verification primers: rpoN<br>locus            | CTGTTCAAGTTTGGCGAATTTTGTCTGTC<br>AC                                                                        |
| oBA788  | oBA788_3528_Nterm_check_F       | Verification primers: ihfA<br>locus            | GCGGAGGGTTATAAGAGCCTCGC                                                                                    |
| oBA1195 | oBA1195_ihfA_DS_R               | Verification primers: ihfA<br>locus            | CGGGCAAAAGTCAGCATGTTATCCATT<br>C                                                                           |
| oBA985  | oBA985_GFF122_aceE_UP_F         | Verification primers: aceE<br>locus            | GTTTATCGAAGAGATTATGCTGGACAG<br>AAGCC                                                                       |
| oBA986  | oBA986_GFF122_aceE_DN_R         | Verification primers: aceE<br>locus            | GGACTIONCATAGAGGCTTTGTCTGCC                                                                                |
| oBA989  | oBA989_GFF2736_tonB_UP_F        | Verification primers: tonB<br>locus            | GCGAGTTGGCATTGTCCTGAGCG                                                                                    |
| oBA990  | oBA990_GFF2736_tonB_DN_R        | Verification primers: tonB<br>locus            | CGATCCGGACGGTAAACCTCGC                                                                                     |
| oBA991  | oBA991_GFF4489_fepA_UP_F        | Verification primers: fepA<br>locus            | CCACCAAAAAGTGACCCGATAATTTCC<br>GTC                                                                         |
| oBA992  | oBA992_GFF4489_fepA_DN_R        | Verification primers: fepA<br>locus            | GCAGGTCGTGTTTCGCGAAAGCT                                                                                    |
| oBA993  | oBA993_GFF4788                  | Verification primers: rpoS                     | GGGCAAAAATCGCTACTATGGGTAGC                                                                                 |

|         |                                  |                                     |                                   |
|---------|----------------------------------|-------------------------------------|-----------------------------------|
|         | _rpoS_UP_F                       | locus                               | AC                                |
| oBA994  | oBA994_GFF4788<br>_rpoS_DN_R     | Verification primers: rpoS<br>locus | CGCGAACACTATCCACAAGCGTTTC         |
| oBA999  | oBA999_GFF3669<br>_ihfB_UP_F     | Verification primers: ihfB<br>locus | GCAATGGCTGAAGCATTCAAAGCAGC        |
| oBA1000 | oBA1000_GFF366<br>9_ihfB_DN_R    | Verification primers: ihfB<br>locus | GACCGTCGTTATCTTCATAGACACCTCC<br>C |
| oBA1095 | oBA1095_STM223<br>2_oafA_check_F | Verification primers: oafA<br>locus | GTCGTCGCGTGGCGAAACG               |
| oBA1096 | oBA1096_STM223<br>2_oafA_check_R | Verification primers: oafA<br>locus | GGCGACGAACTGGCGCAGTAC             |

445

446 *Table S4. Plasmids used in this study.*

| Plasmid | Selection | Source                 |
|---------|-----------|------------------------|
| pSIM5   | CmR       | Gift from Donald Court |

447

448 Table S5. Strains used in this study.

| Strain Number | Genotype                                                             | Source                              | Notes                                                                    |
|---------------|----------------------------------------------------------------------|-------------------------------------|--------------------------------------------------------------------------|
| BA948         | <i>Salmonella enterica</i> serovar Typhimurium MS1868                | Richard Calendar                    | <i>S. Typhimurium</i> LT2 ( <i>leuA414(Am) Fels2- hsdSB(r-m+)</i> ) (36) |
| BA1171        | <i>Escherichia coli</i> BW25113                                      | <i>E. coli</i> Genetic Stock Center |                                                                          |
| BA1150        | <i>S. Typhimurium</i> MS1868 + pSIM5                                 | This Study                          |                                                                          |
| BA1124        | <i>S. Typhimurium</i> MS1868, $\Delta trkH::kanR$                    | This Study                          |                                                                          |
| BA1136        | <i>S. Typhimurium</i> MS1868, $\Delta sapB::kanR$                    | This Study                          |                                                                          |
| BA1139        | <i>S. Typhimurium</i> MS1868, $\Delta rpoN::kanR$                    | This Study                          |                                                                          |
| BA1142        | <i>S. Typhimurium</i> MS1868, $\Delta himA::kanR$                    | This Study                          |                                                                          |
| BA1366        | <i>S. Typhimurium</i> MS1868, $\Delta tonB::kanR$                    | This Study                          |                                                                          |
| BA1368        | <i>S. Typhimurium</i> MS1868, $\Delta fepA::kanR$                    | This Study                          |                                                                          |
| BA1372        | <i>S. Typhimurium</i> MS1868, $\Delta himD::kanR$                    | This Study                          |                                                                          |
| BA1404        | <i>S. Typhimurium</i> MS1868, $\Delta rpoS::kanR$                    | This Study                          |                                                                          |
| BA1460        | <i>S. Typhimurium</i> MS1868, $\Delta oafA::kanR$                    | This Study                          |                                                                          |
| BA1417        | <i>S. Typhimurium</i> MS1868, $\Delta rpoS::ampR$                    | This Study                          |                                                                          |
| BA1429        | <i>S. Typhimurium</i> MS1868, $\Delta trkH::kanR, \Delta rpoS::ampR$ | This Study                          |                                                                          |
| BA1633        | <i>S. Typhimurium</i> MS1868, $\Delta sapB::kanR, \Delta rpoS::ampR$ | This Study                          |                                                                          |
| BA1635        | <i>S. Typhimurium</i> MS1868, $\Delta rpoN::kanR, \Delta rpoS::ampR$ | This Study                          |                                                                          |
| BA1232        | SGSC1412 - <i>S. Typhimurium</i>                                     | Kenneth Sanderson,                  |                                                                          |

|        |                       |                                                              |                                                         |
|--------|-----------------------|--------------------------------------------------------------|---------------------------------------------------------|
|        | LT2 wt                | <i>Salmonella</i> Genetic Stock Center                       |                                                         |
| BA1234 | SGSC68 - SL428        | Kenneth Sanderson,<br><i>Salmonella</i> Genetic Stock Center | <i>rfc-458</i> , semi-rough (Ra with 1 side chain unit) |
| BA1236 | SGSC163 - SL1306      | Kenneth Sanderson,<br><i>Salmonella</i> Genetic Stock Center | <i>galE503</i> , Rc                                     |
| BA1238 | SGSC225 - TSL3770 (a) | Kenneth Sanderson,<br><i>Salmonella</i> Genetic Stock Center | <i>rfa+</i> , smooth                                    |
| BA1240 | SGSC227 - SL3748 (a)  | Kenneth Sanderson,<br><i>Salmonella</i> Genetic Stock Center | <i>rfaI432</i> , Rb3                                    |
| BA1242 | SGSC228 - SL3749 (a)  | Kenneth Sanderson,<br><i>Salmonella</i> Genetic Stock Center | <i>rfaL446</i> , Ra                                     |
| BA1244 | SGSC229 - SL3750 (a)  | Kenneth Sanderson,<br><i>Salmonella</i> Genetic Stock Center | <i>rfaJ417</i> , Rb2                                    |
| BA1246 | SGSC230 - SL3789 (a)  | Kenneth Sanderson,<br><i>Salmonella</i> Genetic Stock Center | <i>rfaF511</i> , Rd2                                    |
| BA1248 | SGSC231 - SL3769 (a)  | Kenneth Sanderson,<br><i>Salmonella</i> Genetic Stock Center | <i>rfaG471</i> , Rd1                                    |
| BA1250 | SGSC258 - SL1102      | Kenneth Sanderson,<br><i>Salmonella</i> Genetic Stock Center | <i>rfaE543</i> , Re                                     |
| BA1252 | SGSC356 - SL4807      | Kenneth Sanderson,<br><i>Salmonella</i> Genetic Stock Center | <i>rfaB707</i> , mixture of Rc + smooth                 |
| BA1254 | SGSC358 - SL3600      | Kenneth Sanderson,<br><i>Salmonella</i> Genetic Stock Center | <i>rfaD657</i> , Re                                     |
| BA1256 | SGSC389 - SL733       | Kenneth Sanderson,<br><i>Salmonella</i> Genetic Stock Center | <i>rfaK953</i> , Rb1                                    |
| BA1258 | SA1377 (b)            | Kenneth Sanderson,<br><i>Salmonella</i> Genetic Stock Center | <i>rfaC630</i> , Re                                     |

449

|        |                 |                                                                 |                             |
|--------|-----------------|-----------------------------------------------------------------|-----------------------------|
| BA1260 | SA1627(his-642) | Kenneth Sanderson,<br><i>Salmonella</i> Genetic Stock<br>Center | <i>rfb-his</i> deletion, Ra |
|--------|-----------------|-----------------------------------------------------------------|-----------------------------|



450 **Dataset S1 (separate file).** Gene-level statistics for genes within the MS1868 RB-TnSeq Library.  
451 **Dataset S2 (separate file).** Overview of RB-TnSeq Experiments.  
452 **Dataset S3 (separate file).** Raw RB-TnSeq Data.  
453 **Dataset S4 (separate file).** High Fitness RB-TnSeq Data.  
454 **Dataset S5 (separate file).** RNA-Seq StringTie Data.  
455 **Dataset S6 (separate file).** RNA-Seq DEseq2 Data.  
456 **Dataset S7 (separate file).** Genome Sequences for Newly Isolated Phages.  
457 **Dataset S8 (separate file).** Gene-level variation observed amongst SARA isolates.  
458 **Dataset S9 (separate file).** Prophage-level variation observed amongst SARA isolates.  
459

460

461

## SI References

462

463

464

465

466

467

468

469

470

471

472

473

474

475

476

477

478

479

480

481

482

483

484

485

486

487

488

489

490

491

492

493

494

495

496

497

498

499

500

501

502

503

504

505

506

507

508

509

510

511

512

513

514

515

1. Murray GL, Attridge SR, Morona R. 2003. Regulation of *Salmonella typhimurium* lipopolysaccharide O antigen chain length is required for virulence; identification of FepE as a second Wzz. *Mol Microbiol* 47:1395–1406.
2. Liu B, Knirel YA, Feng L, Microbiology AVPF, 2014. Structural diversity in *Salmonella*O antigens and its genetic basis. *academic.oup.com*.
3. Gibson DL, White AP, Snyder SD, Martin S, Heiss C, Azadi P, Surette M, Kay WW. 2006. *Salmonella* produces an O-antigen capsule regulated by AgfD and important for environmental persistence. *J Bacteriol* 188:7722–7730.
4. Cota I, Blanc-Potard AB, Casadesús J. 2012. STM2209-STM2208 (opvAB): a phase variation locus of *Salmonella enterica* involved in control of O-antigen chain length. *PLoS One* 7:e36863.
5. Broadbent SE, Davies MR, Van Der Woude MW. 2010. Phase variation controls expression of *Salmonella* lipopolysaccharide modification genes by a DNA methylation-dependent mechanism. *Mol Microbiol* 77:337–353.
6. Klena JD, Ashford RS, Schnaitman CA. 1992. Role of *Escherichia coli* K-12 rfa genes and the rfp gene of *Shigella dysenteriae* 1 in generation of lipopolysaccharide core heterogeneity and attachment of O antigen. *J Bacteriol* 174:7297–7307.
7. Wollin R, Creeger ES, Rothfield LI, Stocker BA, Lindberg AA. 1983. *Salmonella typhimurium* mutants defective in UDP-D-galactose:lipopolysaccharide alpha 1,6-D-galactosyltransferase. Structural, immunochemical, and enzymologic studies of rfaB mutants. *J Biol Chem* 258:3769–3774.
8. Kneidinger B, Marolda C, Graninger M, Zamyatina A, McArthur F, Kosma P, Valvano MA, Messner P. 2002. Biosynthesis pathway of ADP-L-glycero-beta-D-manno-heptose in *Escherichia coli*. *J Bacteriol* 184:363–369.
9. Hauser E, Junker E, Helmuth R, Malorny B. 2011. Different mutations in the oafA gene lead to loss of O5-antigen expression in *Salmonella enterica* serovar Typhimurium. *J Appl Microbiol* 110:248–253.
10. Wright A, McConnell M, Kanegasaki S. 1980. Lipopolysaccharide as a Bacteriophage Receptor, p. 27–57. *In* Randall, LL, Philipson, L (eds.), *Virus Receptors: Part 1 Bacterial Viruses*. Springer Netherlands, Dordrecht.
11. Steinbacher S, Miller S, Baxa U, Budisa N, Weintraub A, Seckler R, Huber R. 1997. Phage P22 tailspike protein: crystal structure of the head-binding domain at 2.3 Å, fully refined structure of the endorhamnosidase at 1.56 Å resolution, and the molecular basis of O-antigen recognition and cleavage. *J Mol Biol* 267:865–880.
12. Tu J, Park T, Morado DR, Hughes KT, Molineux IJ, Liu J. 2017. Dual host specificity of phage SP6 is facilitated by tailspike rotation. *Virology* 507:206–215.
13. Bohm K, Porwollik S, Chu W, Dover JA, Gilcrease EB, Casjens SR, McClelland M, Parent KN. 2018. Genes affecting progression of bacteriophage P22 infection in *Salmonella* identified by transposon and single gene deletion screens. *Mol Microbiol* 108:288–305.
14. Santos SB, Kropinski AM, Ceysens PJ, Ackermann HW, Villegas A, Lavigne R, Krylov VN, Carvalho CM, Ferreira EC, Azeredo J. 2011. Genomic and Proteomic Characterization of the Broad-Host-Range *Salmonella* Phage PVP-SE1: Creation of a New Phage Genus. *J Virol* 85:11265–11273.
15. Lindberg AA, Hellerqvist CG. 1971. Bacteriophage attachment sites, serological specificity, and chemical composition of the lipopolysaccharides of semirough and rough mutants of *Salmonella typhimurium*. *J Bacteriol* 105:57–64.
16. Marti R, Zurfluh K, Hagens S, Pianezzi J, Klumpp J, Loessner MJ. 2013. Long tail fibres of the novel broad-host-range T-even bacteriophage S16 specifically recognize *Salmonella*OmpC. *Mol Microbiol* 87:818–834.
17. Toguchi A, Siano M, Burkart M, Harshey RM. 2000. Genetics of swarming motility in *Salmonella enterica* serovar typhimurium: critical role for lipopolysaccharide. *J Bacteriol* 182:6308–6321.
18. Price MN, Wetmore KM, Waters RJ, Callaghan M, Ray J, Liu H, Kuehl JV, Melnyk RA,

- 516 Lamson JS, Suh Y, Carlson HK, Esquivel Z, Sadeeshkumar H, Chakraborty R, Zane GM,  
517 Rubin BE, Wall JD, Visel A, Bristow J, Blow MJ, Arkin AP, Deutschbauer AM. 2018. Mutant  
518 phenotypes for thousands of bacterial genes of unknown function. *Nature* 557:503–509.
- 519 19. Mutalik VK, Adler BA, Rishi HS, Piya D, Zhong C, Koskella B, Calendar R, Novichkov P,  
520 Price MN, Deutschbauer AM, Arkin AP. 2020. High-throughput mapping of the phage  
521 resistance landscape in *E. coli*. *bioRxiv*.
- 522 20. Mizuno T, Kato M, Jo YL, Mizushima S. 1988. Interaction of OmpR, a positive regulator, with  
523 the osmoregulated ompC and ompF genes of *Escherichia coli*. Studies with wild-type and  
524 mutant OmpR proteins. *J Biol Chem* 263:1008–1012.
- 525 21. Pagès J-M. 2004. Role of Bacterial Porins in Antibiotic Susceptibility of Gram-Negative  
526 Bacteria, p. 41–59. *In* Benz, R (ed.), *Bacterial and Eukaryotic Porins*. Wiley-VCH Verlag  
527 GmbH & Co. KGaA, Weinheim, FRG.
- 528 22. Fernández L, Hancock REW. 2012. Adaptive and mutational resistance: role of porins and  
529 efflux pumps in drug resistance. *Clin Microbiol Rev* 25:661–681.
- 530 23. Ghai I, Ghai S. 2018. Understanding antibiotic resistance via outer membrane permeability.  
531 *Infect Drug Resist* 11:523–530.
- 532 24. Rabsch W, Ma L, Wiley G, Najar FZ, Kaserer W, Schuerch DW, Klebba JE, Roe BA, Gomez  
533 JAL, Schallmey M, Newton SMC, Klebba PE. 2007. FepA- and TonB-Dependent  
534 Bacteriophage H8: Receptor Binding and Genomic Sequence. *J Bacteriol* 189:5658–5674.
- 535 25. Heller K, Braun V. 1982. Polymannose O-antigens of *Escherichia coli*. *J Virol* 41:222–227.
- 536 26. Kim M, Ryu S. 2012. Spontaneous and transient defence against bacteriophage by phase-  
537 variable glucosylation of O-antigen in *Salmonella enterica* serovar Typhimurium. *Mol*  
538 *Microbiol* 86:411–425.
- 539 27. Schade SZ, Adler J, Ris H. 1967. How bacteriophage chi attacks motile bacteria. *J Virol*  
540 1:599–609.
- 541 28. Macnab RM. 2003. How bacteria assemble flagella. *Annu Rev Microbiol* 57:77–100.
- 542 29. Samuel AD, Pitta TP, Ryu WS, Danese PN, Leung EC, Berg HC. 1999. Flagellar  
543 determinants of bacterial sensitivity to chi-phage. *Proceedings of the National Academy of*  
544 *Sciences* 96:9863–9866.
- 545 30. Christen M, Beusch C, Bösch Y, Cerletti D, Flores-Tinoco CE, Del Medico L, Tschan F,  
546 Christen B. 2016. Quantitative Selection Analysis of Bacteriophage  $\phi$ CbK Susceptibility in  
547 *Caulobacter crescentus*. *J Mol Biol* 428:419–430.
- 548 31. Ikeda JS, Schmitt CK, Darnell SC, Watson PR, Bispham J, Wallis TS, Weinstein DL, Metcalf  
549 ES, Adams P, O'Connor CD, O'Brien AD. 2001. Flagellar phase variation of *Salmonella*  
550 *enterica* serovar Typhimurium contributes to virulence in the murine typhoid infection model  
551 but does not influence *Salmonella*-induced enteropathogenesis. *Infect Immun* 69:3021–3030.
- 552 32. Choi Y, Shin H, Lee J-H, Ryu S. 2013. Identification and characterization of a novel  
553 flagellum-dependent *Salmonella*-infecting bacteriophage, iEPS5. *Appl Environ Microbiol*  
554 79:4829–4837.
- 555 33. Wilkinson RG, Gemski P, Stocker BA. 1972. Non-smooth mutants of *Salmonella*  
556 typhimurium: differentiation by phage sensitivity and genetic mapping. *J Gen Microbiol*  
557 70:527–554.
- 558 34. Heinrichs DE, Yethon JA, Whitfield C. 1998. Molecular basis for structural diversity in the  
559 core regions of the lipopolysaccharides of *Escherichia coli* and *Salmonella enterica*. *Mol*  
560 *Microbiol* 30:221–232.
- 561 35. Wetmore KM, Price MN, Waters RJ, Lamson JS, He J, Hoover CA, Blow MJ, Bristow J,  
562 Butland G, Arkin AP, Deutschbauer A. 2015. Rapid quantification of mutant fitness in diverse  
563 bacteria by sequencing randomly bar-coded transposons. *Am Soc Microbiol* 6:e00306–15.
- 564 36. Graña D, Youderian P, Susskind MM. 1985. Mutations that improve the ant promoter of  
565 *Salmonella* phage P22. *Genetics* 110:1–16.
- 566 37. Porwollik S, Santiviago CA, Cheng P, Long F, Desai P, Fredlund J, Srikumar S, Silva CA,  
567 Chu W, Chen X, Canals R, Reynolds MM, Bogomolnaya L, Shields C, Cui P, Guo J, Zheng  
568 Y, Endicott-Yazdani T, Yang H-J, Maple A, Ragoza Y, Blondel CJ, Valenzuela C, Andrews-  
569 Polymenis H, McClelland M. 2014. Defined single-gene and multi-gene deletion mutant  
570 collections in *Salmonella enterica* sv Typhimurium. *PLoS One* 9:e99820.
- 571
